# Supplementary material for: Copper-catalyzed one-pot three-component thioamination of 1,4-naphthoquinone
Source: Royal Society of Chemistry journal article supplement (doi:10.1039/c9qo00091g), 2019-01-01

# Supporting Information

## Copper-Catalyzed One-Pot Three-Component Thioamination of 1,4-Naphthoquinone

Fan-Lin Zeng,<sup>a</sup> Xiao-Lan Chen,<sup>\*a,d</sup> Shuai-Qi He,<sup>a</sup> Kai Sun,<sup>a</sup> Yan Liu,<sup>a,c</sup> Rui Fu,<sup>a</sup> Ling-Bo Qu,<sup>a</sup> Yu-Fen Zhao,<sup>a,d</sup> and Bing Yu<sup>\*a,b</sup>

<sup>a</sup> College of Chemistry and Molecular Engineering, Zhengzhou University, Zhengzhou 450001, China. E-mail: chenxl@zzu.edu.cn; bingyu@zzu.edu.cn

<sup>b</sup> Henan Nonferrous Metals Geological Exploration Institute, Zhengzhou 450052, Henan Province, China.

<sup>c</sup> College of biological and pharmaceutical engineering, Xinyang Agriculture & Forestry University, Xinyang 464000, China

<sup>d</sup> The Key Laboratory for Chemical Biology of Fujian Province, Xiamen University, Xiamen 361005, China

---

### Table of Contents

|                                                                          |    |
|--------------------------------------------------------------------------|----|
| 1. General information .....                                             | 2  |
| 2. Experimental procedure for synthesis of <b>4a-4z</b> .....            | 2  |
| 3. Experimental procedure for synthesis of <b>6a-6c</b> .....            | 2  |
| 4. Optimization of the reaction conditions .....                         | 3  |
| 5. Control experiments .....                                             | 4  |
| 6. Characterization data .....                                           | 6  |
| 7. <sup>1</sup> H, <sup>13</sup> C and <sup>19</sup> F NMR spectra ..... | 16 |

## 1. General information

Solvents and all the naphthoquinone, thiols and amines were purchased from commercial suppliers and used without further purification. Silica gel was purchased from Qing Dao Hai Yang Chemical Industry. The  $^1\text{H}$  NMR (400 MHz),  $^{13}\text{C}$  NMR (101 MHz) and  $^{19}\text{F}$  NMR (376 MHz) spectra data were recorded on Bruker advance 400 MHz spectrometer using  $\text{CDCl}_3$  as solvent.  $^{13}\text{C}$  NMR (101 MHz) and  $^{19}\text{F}$  NMR (376 MHz) spectra being recorded with broad band proton decoupled.  $^1\text{H}$  NMR and  $^{13}\text{C}$  NMR spectra was recorded with tetramethylsilane ( $\delta = 0.00$  ppm) as internal reference. High resolution mass spectra (HRMS) were obtained with a Waters Micromass Q-ToF Micro instrument using the ESI technique.

## 2. Experimental procedure for synthesis of 4a-4z

To a 25 mL Schlenk tube, naphthoquinone **1** (0.5 mmol), thiols **2** (0.5 mmol), amines **3** (1.75 mmol) and CuI (0.1 mmol) were dissolved in DMF (2 mL), and then the tube was covered and stirred at 100 °C for 10 h under  $\text{O}_2$  balloon. After reaction, the mixture was diluted with saturated saline (15 mL $\times$ 2) and extracted with ethyl acetate (25 mL $\times$ 3). The combined organic layers were collected and dried by anhydrous  $\text{Na}_2\text{SO}_4$ . The residue was purified by column chromatography on silica gel to afford the desired products (eluent: ethyl acetate/PE, 1/10-1/20). (For the synthesis of **4y**, a condenser was necessary due to the low boil point of n-propylamine)

## 3. Experimental procedure for synthesis of 6a-6c

To a 25 mL Schlenk tube, naphthoquinone **1** (0.5 mmol), **5** (0.75 mmol), and CuI (0.1 mmol) were dissolved in DMF (2 mL), and then the tube was covered and stirred at 100 °C for 10 h under  $\text{O}_2$  balloon. After reaction, the mixture was diluted with saturated saline (15 mL $\times$ 2) and extracted with ethyl acetate (25 mL $\times$ 3). The combined organic layers were collected and dried by anhydrous  $\text{Na}_2\text{SO}_4$ . The residue was purified by column chromatography on silica gel to afford the desired products.

#### 4. Optimization of the reaction conditions <sup>[a]</sup>

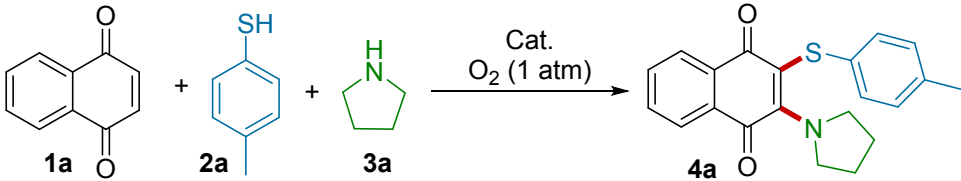

| Entry             | Cat.                                 | Solvent                  | Temp.(°C) | Yield(%) <sup>[b]</sup> |
|-------------------|--------------------------------------|--------------------------|-----------|-------------------------|
| 1                 | FeSO <sub>4</sub> ·7H <sub>2</sub> O | DMA                      | 100       | 20                      |
| 2                 | CuCl                                 | DMA                      | 100       | 35                      |
| 3                 | I <sub>2</sub>                       | DMA                      | 100       | 12                      |
| 4                 | Cu(OAc) <sub>2</sub>                 | DMA                      | 100       | 15                      |
| 5                 | CuBr                                 | DMA                      | 100       | 55                      |
| 6                 | CuCN                                 | DMA                      | 100       | 54                      |
| 7                 | CuCl <sub>2</sub>                    | DMA                      | 100       | 40                      |
| 8                 | Cu <sub>2</sub> O                    | DMA                      | 100       | 40                      |
| 9                 | CuI                                  | DMA                      | 100       | 74                      |
| 10                | CuI                                  | DMSO                     | 100       | 50                      |
| 11                | CuI                                  | MeCN                     | 100       | 30                      |
| 12                | CuI                                  | DMF                      | 100       | 82                      |
| 13                | CuI                                  | H <sub>2</sub> O         | 100       | trace                   |
| 14                | CuI                                  | THF                      | 100       | 30                      |
| 15                | CuI                                  | toluene                  | 100       | 20                      |
| 16                | CuI                                  | DMF:H <sub>2</sub> O=1:1 | 100       | 15                      |
| 17                | CuI                                  | DMF:H <sub>2</sub> O=2:1 | 100       | 25                      |
| 18                | CuI                                  | DMF                      | 120       | 78                      |
| 19                | CuI                                  | DMF                      | 90        | 70                      |
| 20                | CuI                                  | DMF                      | 80        | 58                      |
| 21                | -                                    | DMF                      | 100       | 15                      |
| 22 <sup>[c]</sup> | CuI                                  | DMF                      | 100       | 35                      |
| 23 <sup>[d]</sup> | CuI                                  | DMF                      | 100       | 76                      |
| 24 <sup>[e]</sup> | CuI                                  | DMF                      | 100       | 64                      |
| 25 <sup>[f]</sup> | CuI                                  | DMF                      | 100       | 80                      |

[a] Reaction conditions: **1a** (0.2 mmol), **2a** (0.2 mmol), **3a** (0.75 mmol), catalyst (20 mol%), solvent (1 mL), O<sub>2</sub> balloon, 10 h. [b] Yields were given by <sup>1</sup>H NMR using 1,1,2,2-tetrachloroethane as internal standard. [c] Air condition. [d] Reaction for 8 h. [e] CuI (10 mol%). [f] Reaction for 12 h. DMA = *N,N*-dimethylacetamide.

## 5. Control experiments

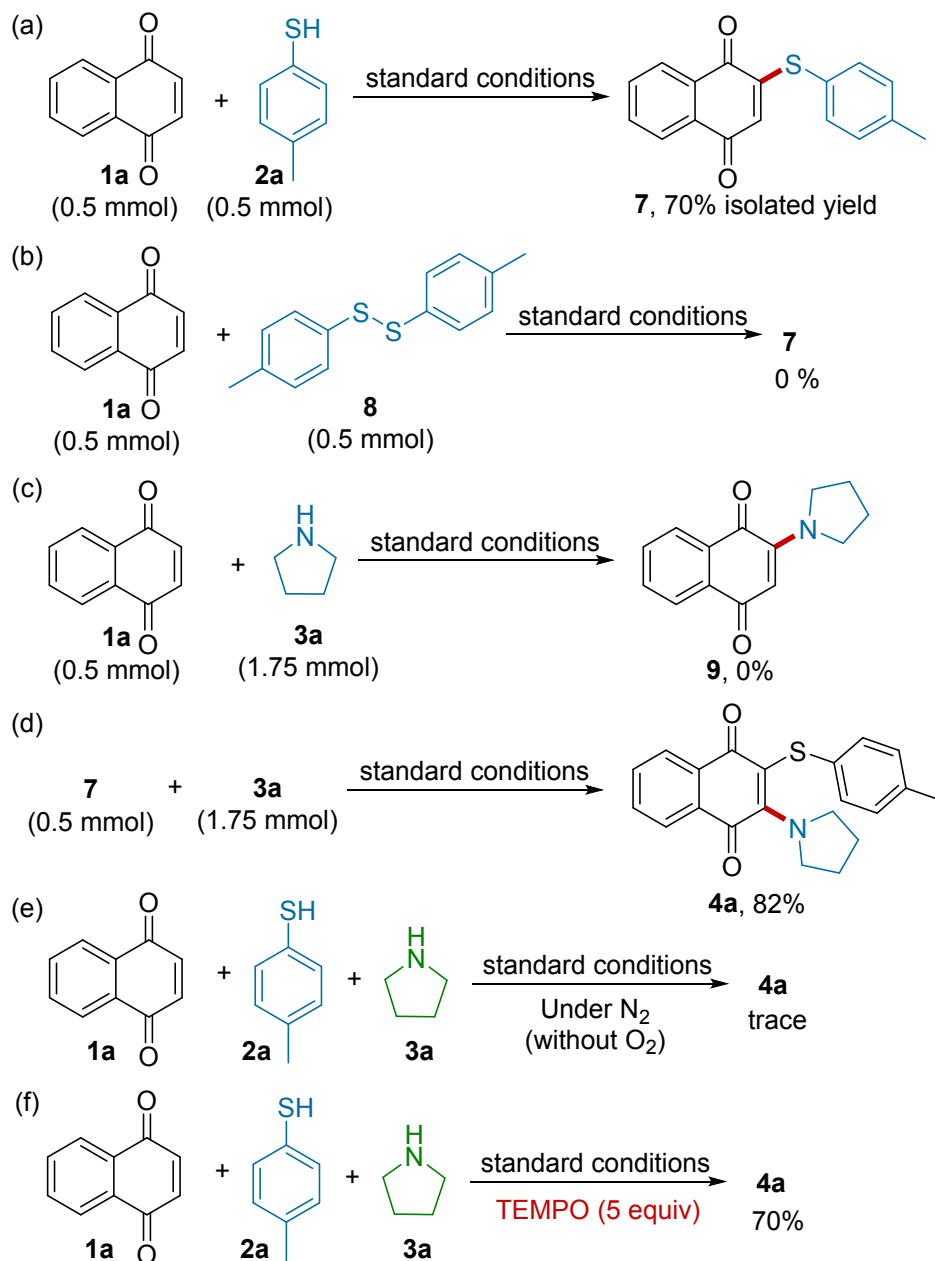

Experimental procedure for synthesis of Scheme (a): To a 25 mL Schlenk tube, **1a** (0.5 mmol), **2a** (0.5 mmol), and CuI (0.1 mmol) were dissolved in DMF (2 mL), and then the tube was covered and stirred at 100 °C for 10 h under O<sub>2</sub> balloon. After reaction, the mixture was diluted with saturated saline (15ml×2) and extracted with ethyl acetate (25 mL×3). The combined organic layers were collected and dried by anhydrous Na<sub>2</sub>SO<sub>4</sub>. The residue was purified by column chromatography on silica gel to afford the desired products.

Experimental procedure for synthesis of Scheme (b): To a 25 mL Schlenk tube, **1a** (0.5 mmol), **8** (0.5 mmol), CuI (0.1 mmol) were dissolved in DMF (2 mL), and then the tube was covered and stirred at 100 °C for 10 h under O<sub>2</sub> balloon.

Experimental procedure for synthesis of Scheme (c): To a 25 mL Schlenk tube, **1a** (0.5 mmol), **3a** (1.75 mmol), CuI (0.1 mmol) were dissolved in DMF (2 mL), and then the tube was covered and stirred at 100 °C for 10 h under O<sub>2</sub> balloon.

Experimental procedure for synthesis of Scheme (d): To a 25 mL Schlenk tube, **7** (0.5 mmol), **3a** (0.75 mmol), and CuI (0.1 mmol) were dissolved in DMF (2 mL), and then the tube was covered and stirred at 100 °C for 10 h under O<sub>2</sub> balloon. After reaction, the mixture was diluted with saturated saline (15ml×2) and extracted with ethyl acetate (25 mL×3). The combined organic layers were collected and dried by anhydrous Na<sub>2</sub>SO<sub>4</sub>. The residue was purified by column chromatography on silica gel to afford the desired products.

Experimental procedure for synthesis of Scheme (e): To a 25 mL Schlenk tube, **1a** (0.5 mmol), **2a** (0.5 mmol), **3a** (0.75 mmol) and CuI (0.1 mmol) were dissolved in DMF (2 mL), and then the tube was covered and stirred at 100 °C for 10 h under N<sub>2</sub> balloon.

Experimental procedure for synthesis of Scheme (f): To a 25 mL Schlenk tube, **1a** (0.5 mmol), **2a** (0.5 mmol), **3a** (0.75 mmol), TEMPO (5equiv) and CuI (0.1 mmol) were dissolved in DMF (2 mL), and then the tube was covered and stirred at 100 °C for 10 h under O<sub>2</sub> balloon. After reaction, the mixture was diluted with saturated saline (15ml×2) and extracted with ethyl acetate (25 mL×3). The combined organic layers were collected and dried by anhydrous Na<sub>2</sub>SO<sub>4</sub>. The residue was purified by column chromatography on silica gel to afford the desired products.

## 6. Characterization data

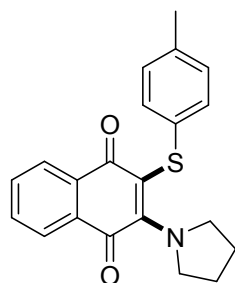

2-(pyrrolidin-1-ylmethyl)-3-(*p*-tolylthio)naphthalene-1,4-dione (**4a**)

Red solid, 80% yield (145 mg), mp 56.3-57.3 °C; <sup>1</sup>H NMR (400 MHz, Chloroform-*d*) δ 8.10 (dd, *J* = 7.7, 1.3 Hz, 1H), 7.93 (dd, *J* = 7.7, 1.3 Hz, 1H), 7.69 (td, *J* = 7.5, 1.4 Hz, 1H), 7.60 (td, *J* = 7.5, 1.3 Hz, 1H), 7.05 (q, *J* = 8.3 Hz, 5H), 3.94 – 3.85 (m, 4H), 2.28 (s, 3H), 1.85 – 1.77 (m, 4H). <sup>13</sup>C NMR (101 MHz, Chloroform-*d*) δ 184.38, 180.28, 155.60, 135.05, 134.77, 134.08, 133.46, 131.95,

131.89, 129.58, 126.38, 126.23, 125.89, 105.65, 53.81, 25.50, 20.93; HRMS Calcd for  $C_{21}H_{20}NO_2S$   $[M + H]^+$ :  $m/z$  350.1209, found: 350.1196.

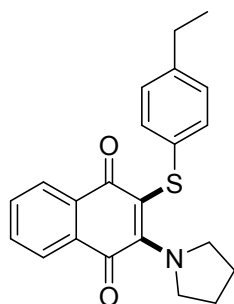

2-((4-ethylphenyl)thio)-3-(pyrrolidin-1-yl)naphthalene-1,4-dione (**4b**)

Red solid, 65% yield (117 mg), mp 62.5-63.5 °C;  $^1H$  NMR (400 MHz, Chloroform-*d*)  $\delta$  8.11 (dd,  $J = 7.7, 1.3$  Hz, 1H), 7.94 (dd,  $J = 7.6, 1.3$  Hz, 1H), 7.70 (td,  $J = 7.5, 1.4$  Hz, 1H), 7.61 (td,  $J = 7.5, 1.3$  Hz, 1H), 7.13 – 7.04 (m, 4H), 3.97 – 3.85 (m, 4H), 2.58 (q,  $J = 7.6$  Hz, 2H), 1.87 – 1.75 (m, 4H), 1.20 (t,  $J = 7.6$  Hz, 3H).  $^{13}C$  NMR (101 MHz, Chloroform-*d*)  $\delta$  184.43, 180.30, 155.63, 141.19, 135.23, 134.10, 133.46, 131.94, 131.91, 128.40, 126.41, 126.23, 125.90, 105.59, 53.83, 28.32, 25.51, 15.57. HRMS Calcd for  $C_{22}H_{22}NO_2S$   $[M + H]^+$ :  $m/z$  364.1366, found: 364.1365.

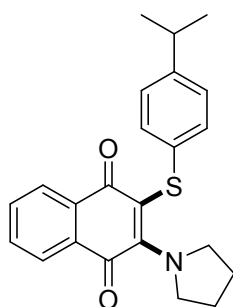

2-((4-isopropylphenyl)thio)-3-(pyrrolidin-1-yl)naphthalene-1,4-dione (**4c**)

Red solid, 70% yield (131 mg), mp 62.4-63.8 °C;  $^1H$  NMR (400 MHz, Chloroform-*d*)  $\delta$  8.09 (dd,  $J = 7.7, 1.3$  Hz, 1H), 7.92 (dd,  $J = 7.6, 1.3$  Hz, 1H), 7.68 (td,  $J = 7.5, 1.4$  Hz, 1H), 7.59 (td,  $J = 7.5, 1.3$  Hz, 1H), 7.07 (m, 4H), 3.94 – 3.82 (m, 4H), 2.81 (m,  $J = 6.9$  Hz, 1H), 1.83 – 1.74 (m, 4H), 1.19 (d,  $J = 6.9$  Hz, 6H).  $^{13}C$  NMR (101 MHz, Chloroform-*d*)  $\delta$  184.42, 180.31, 155.60, 145.80, 135.26, 134.09, 133.46, 131.94, 131.90, 126.97, 126.41, 126.19, 125.90, 105.66, 53.83, 33.59, 25.50, 23.98. HRMS Calcd for  $C_{23}H_{24}NO_2S$   $[M + H]^+$ :  $m/z$  378.1522, found: 378.1525.

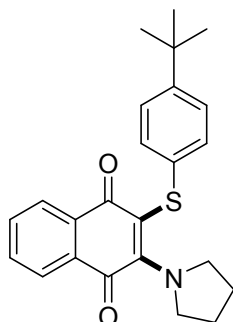

2-((4-tert-butylphenyl)thio)-3-(pyrrolidin-1-yl)naphthalene-1,4-dione (**4d**)

Red solid, 77% yield (150 mg), mp 62.6-64.0 °C;  $^1H$  NMR (400 MHz, Chloroform-*d*)  $\delta$  8.08 (dd,  $J = 7.7, 1.3$  Hz, 1H), 7.91 (dd,  $J = 7.7, 1.4$  Hz, 1H), 7.67 (td,  $J = 7.5, 1.4$  Hz, 1H), 7.58 (td,  $J = 7.5, 1.3$  Hz, 1H), 7.22 (d,  $J = 8.6$  Hz, 2H), 7.08 (d,  $J = 8.5$  Hz, 2H), 3.94 – 3.82 (m, 4H), 1.85 – 1.70

(m, 4H), 1.26 (s, 10H).  $^{13}\text{C}$  NMR (101 MHz, Chloroform-*d*)  $\delta$  184.42, 180.30, 155.66, 148.05, 135.02, 134.08, 133.48, 131.97, 131.89, 126.39, 125.90, 125.85, 105.62, 53.84, 34.34, 31.33, 25.49. HRMS Calcd for  $\text{C}_{24}\text{H}_{25}\text{NO}_2\text{SNa}$  [ $\text{M} + \text{Na}$ ] $^+$ :  $m/z$  414.1498, found: 414.1505.

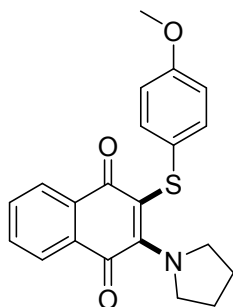

2-((4-methoxyphenyl)thio)-3-(pyrrolidin-1-yl)naphthalene-1,4-dione (**4e**)

Red solid, 60% yield (110 mg), mp 53.5-55.0 °C;  $^1\text{H}$  NMR (400 MHz, Chloroform-*d*)  $\delta$  8.08 (dd,  $J = 7.6, 1.3$  Hz, 1H), 7.90 (dd,  $J = 7.6, 1.4$  Hz, 1H), 7.66 (td,  $J = 7.5, 1.4$  Hz, 1H), 7.58 (td,  $J = 7.5, 1.3$  Hz, 1H), 7.16 – 7.08 (m, 2H), 6.80 – 6.73 (m, 2H), 3.90 – 3.83 (m, 4H), 3.74 (s, 3H), 1.85 – 1.74 (m, 4H).  $^{13}\text{C}$  NMR (101 MHz, Chloroform-*d*)  $\delta$  184.35, 180.43, 157.80, 155.15, 134.05, 133.43, 131.90, 129.11, 128.42, 126.34, 125.88, 114.58, 107.21, 55.35, 53.83, 25.52. HRMS Calcd for  $\text{C}_{21}\text{H}_{20}\text{NO}_3\text{S}$  [ $\text{M} + \text{H}$ ] $^+$ :  $m/z$  366.1158, found: 366.1150.

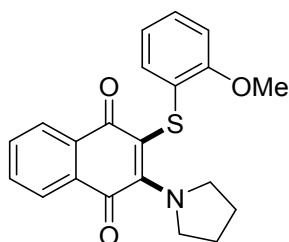

2-((2-methoxyphenyl)thio)-3-(pyrrolidin-1-yl)naphthalene-1,4-dione (**4f**)

Red solid, 71% yield (129 mg), mp 64.5-66.3 °C;  $^1\text{H}$  NMR (400 MHz, Chloroform-*d*)  $\delta$  8.09 (dd,  $J = 7.6, 1.3$  Hz, 1H), 7.92 (dd,  $J = 7.8, 1.3$  Hz, 1H), 7.68 (td,  $J = 7.6, 1.4$  Hz, 1H), 7.59 (td,  $J = 7.5, 1.4$  Hz, 1H), 7.06 (ddd,  $J = 8.5, 7.1, 1.8$  Hz, 1H), 6.90 – 6.77 (m, 3H), 3.90 (d,  $J = 3.7$  Hz, 7H), 1.85 – 1.75 (m, 4H).  $^{13}\text{C}$  NMR (101 MHz, Chloroform-*d*)  $\delta$  184.50, 180.09, 156.73, 155.51, 134.11, 133.59, 132.03, 131.85, 127.10, 126.42, 126.37, 125.90, 125.61, 121.16, 110.36, 103.00, 55.87, 53.80, 25.50. HRMS Calcd for  $\text{C}_{21}\text{H}_{20}\text{NO}_3\text{S}$  [ $\text{M} + \text{H}$ ] $^+$ :  $m/z$  366.1158, found: 366.1157.

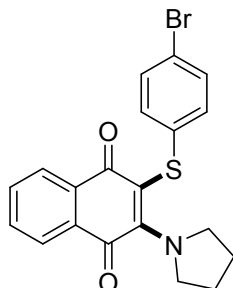

2-((4-bromophenyl)thio)-3-(pyrrolidin-1-yl)naphthalene-1,4-dione (**4g**)

Red solid, 70% yield (144 mg), mp 66.8-68.7 °C;  $^1\text{H}$  NMR (400 MHz, Chloroform-*d*)  $\delta$  8.07 (dd,  $J = 7.6, 1.3$  Hz, 1H), 7.91 (dd,  $J = 7.7, 1.3$  Hz, 1H), 7.68 (td,  $J = 7.5, 1.4$  Hz, 1H), 7.60 (td,  $J = 7.6, 1.4$  Hz, 1H), 7.33 – 7.29 (m, 2H), 7.04 – 6.99 (m, 2H), 3.94 – 3.85 (m, 4H), 1.88 – 1.79 (m, 4H).

$^{13}\text{C}$  NMR (101 MHz, Chloroform-*d*)  $\delta$  184.29, 180.00, 156.44, 138.39, 134.27, 133.32, 132.06, 131.92, 131.78, 127.41, 126.42, 126.03, 118.34, 103.34, 54.08, 25.50. HRMS Calcd for  $\text{C}_{20}\text{H}_{16}\text{BrNO}_2\text{SNa}$  [ $\text{M} + \text{Na}$ ] $^+$ :  $m/z$  435.9977, found: 435.9980.

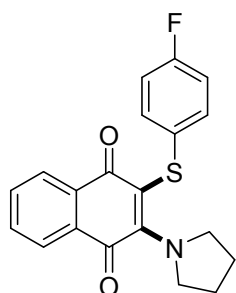

2-((4-fluorophenyl)thio)-3-(pyrrolidin-1-yl)naphthalene-1,4-dione (**4h**)

Red solid, 70% yield (123 mg), mp 62.2-63.8 °C;  $^1\text{H}$  NMR (400 MHz, Chloroform-*d*)  $\delta$  8.07 (dd,  $J = 7.6, 1.3$  Hz, 1H), 7.91 (dd,  $J = 7.6, 1.3$  Hz, 1H), 7.68 (td,  $J = 7.5, 1.4$  Hz, 1H), 7.59 (td,  $J = 7.5, 1.3$  Hz, 1H), 7.16 – 7.10 (m, 2H), 6.91 (t,  $J = 8.7$  Hz, 2H), 3.94 – 3.84 (m, 4H), 1.86 – 1.80 (m, 4H).  $^{13}\text{C}$  NMR (101 MHz, Chloroform-*d*)  $\delta$  184.33, 180.21, 162.03, 159.60, 156.04, 134.20, 133.86 (d,  $J = 3.2$  Hz), 133.35, 131.95 (d,  $J = 12.8$  Hz), 127.89 (d,  $J = 7.6$  Hz), 126.38, 125.97, 115.91 (d,  $J = 22.0$  Hz), 105.03, 54.03, 25.50.  $^{19}\text{F}$  NMR (376 MHz, Chloroform-*d*)  $\delta$  -117.67. HRMS Calcd for  $\text{C}_{20}\text{H}_{17}\text{FNO}_2\text{S}$  [ $\text{M} + \text{H}$ ] $^+$ :  $m/z$  354.0959, found: 354.0959.

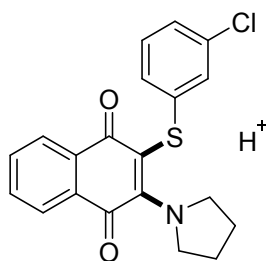

2-((3-chlorophenyl)thio)-3-(pyrrolidin-1-yl)naphthalene-1,4-dione (**4i**)

Red solid, 60% yield (110 mg), mp 62.5-63.5 °C;  $^1\text{H}$  NMR (400 MHz, Chloroform-*d*)  $\delta$  8.09 (dd,  $J = 7.6, 1.3$  Hz, 1H), 7.93 (dd,  $J = 7.8, 1.3$  Hz, 1H), 7.70 (td,  $J = 7.5, 1.4$  Hz, 1H), 7.61 (td,  $J = 7.6, 1.4$  Hz, 1H), 7.17 – 7.08 (m, 2H), 7.03 (m,  $J = 7.6, 4.4, 1.4$  Hz, 2H), 3.96 – 3.87 (m, 4H), 1.89 – 1.80 (m, 4H).  $^{13}\text{C}$  NMR (101 MHz, Chloroform-*d*)  $\delta$  184.30, 180.00, 156.51, 141.31, 134.72, 134.30, 133.34, 132.07, 131.95, 129.86, 126.49, 126.06, 125.39, 124.99, 123.81, 102.91, 54.12, 25.50. HRMS Calcd for  $\text{C}_{20}\text{H}_{17}\text{ClNO}_2\text{S}$  [ $\text{M} + \text{H}$ ] $^+$ :  $m/z$  370.0663, found: 370.0661.

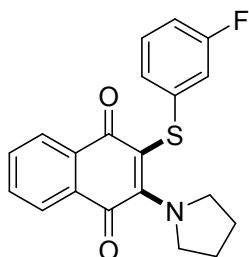

2-((3-fluorophenyl)thio)-3-(pyrrolidin-1-yl)naphthalene-1,4-dione (**4j**)

Red solid, 60% yield (106 mg), mp 117.0-118.0 °C;  $^1\text{H}$  NMR (400 MHz, Chloroform-*d*)  $\delta$  8.09 (dd,  $J = 7.6, 1.3$  Hz, 1H), 7.93 (dd,  $J = 7.7, 1.3$  Hz, 1H), 7.70 (td,  $J = 7.6, 1.4$  Hz, 1H), 7.61 (td,  $J = 7.5, 1.4$  Hz, 1H), 7.17 (td,  $J = 8.0, 5.9$  Hz, 1H), 6.98 – 6.90 (m, 1H), 6.83 (dt,  $J = 9.6, 2.2$  Hz,



1H), 6.76 (td,  $J = 8.4, 2.5$  Hz, 1H), 3.96 – 3.88 (m, 4H), 1.90 – 1.80 (m, 4H).  $^{13}\text{C}$  NMR (101 MHz, Chloroform-*d*)  $\delta$  184.34, 180.02, 164.30, 161.84, 156.57, 141.72 (d,  $J = 7.4$  Hz), 134.29, 133.35, 132.01 (d,  $J = 9.7$  Hz), 130.09 (d,  $J = 8.7$  Hz), 126.49, 126.05, 121.30, 112.62 (d,  $J = 24.2$  Hz), 111.80 (d,  $J = 21.4$  Hz), 102.99, 54.11, 25.49.  $^{19}\text{F}$  NMR (376 MHz, Chloroform-*d*)  $\delta$  -112.39. HRMS Calcd for  $\text{C}_{20}\text{H}_{17}\text{FNO}_2\text{S}$  [ $\text{M} + \text{H}$ ] $^+$ :  $m/z$  354.0959, found: 354.0962.

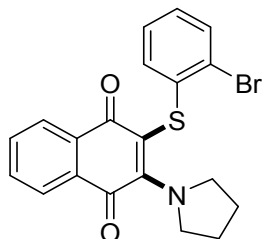

2-((2-bromophenyl)thio)-3-(pyrrolidin-1-yl)naphthalene-1,4-dione (**4k**)

Red solid, 63% yield (130 mg), mp 136.2-138.0 °C;  $^1\text{H}$  NMR (400 MHz, Chloroform-*d*)  $\delta$  8.09 (dd,  $J = 7.6, 1.3$  Hz, 1H), 7.93 (dd,  $J = 7.6, 1.3$  Hz, 1H), 7.70 (td,  $J = 7.5, 1.4$  Hz, 1H), 7.61 (td,  $J = 7.6, 1.3$  Hz, 1H), 7.48 (dd,  $J = 7.9, 1.3$  Hz, 1H), 7.14 (td,  $J = 7.7, 1.4$  Hz, 1H), 6.97 – 6.89 (m, 2H), 3.95 – 3.88 (m, 4H), 1.89 – 1.79 (m, 4H).  $^{13}\text{C}$  NMR (101 MHz, Chloroform-*d*)  $\delta$  184.41, 179.90, 157.05, 139.95, 134.31, 133.43, 132.72, 132.03, 127.67, 126.92, 126.49, 126.05, 125.82, 120.24, 102.74, 54.06, 25.49. HRMS Calcd for  $\text{C}_{20}\text{H}_{17}\text{BrNO}_2\text{S}$  [ $\text{M} + \text{H}$ ] $^+$ :  $m/z$  414.0158, found: 414.0162.

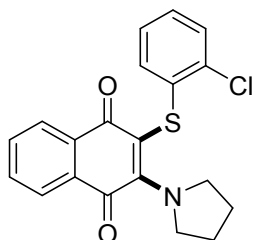

2-((2-chlorophenyl)thio)-3-(pyrrolidin-1-yl)naphthalene-1,4-dione (**4l**)

Red solid, 62% yield (114 mg), mp 148.5-149.7 °C.  $^1\text{H}$  NMR (400 MHz, Chloroform-*d*)  $\delta$  8.09 (dd,  $J = 7.8, 1.2$  Hz, 1H), 7.93 (dd,  $J = 7.6, 1.3$  Hz, 1H), 7.69 (td,  $J = 7.6, 1.4$  Hz, 1H), 7.61 (td,  $J = 7.6, 1.4$  Hz, 1H), 7.30 (dd,  $J = 7.8, 1.4$  Hz, 1H), 7.09 (td,  $J = 7.6, 1.5$  Hz, 1H), 7.01 (td,  $J = 7.6, 1.7$  Hz, 1H), 6.93 (dd,  $J = 7.8, 1.6$  Hz, 1H), 3.96 – 3.87 (m, 4H), 1.90 – 1.79 (m, 4H).  $^{13}\text{C}$  NMR (101 MHz, Chloroform-*d*)  $\delta$  184.37, 179.93, 157.12, 138.02, 134.28, 133.43, 132.02, 132.00, 130.59, 129.46, 127.08, 126.88, 126.46, 126.05, 125.58, 102.09, 54.07, 25.48. HRMS Calcd for  $\text{C}_{20}\text{H}_{17}\text{ClNO}_2\text{S}$  [ $\text{M} + \text{H}$ ] $^+$ :  $m/z$  370.0663, found: 370.0676.

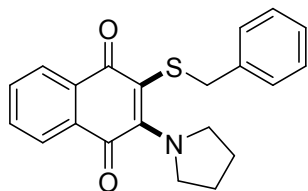

2-(benzylthio)-3-(pyrrolidin-1-yl)naphthalene-1,4-dione (**4m**)

Red solid, 50% yield (87 mg), mp 72.0-73.9 °C;  $^1\text{H}$  NMR (400 MHz, Chloroform-*d*)  $\delta$  8.09 (dd,  $J = 7.6, 1.2$  Hz, 1H), 7.82 (dd,  $J = 7.6, 1.3$  Hz, 1H), 7.66 (td,  $J = 7.5, 1.4$  Hz, 1H), 7.55 (td,  $J = 7.6, 1.3$  Hz, 1H), 7.24 – 7.17 (m, 2H), 7.14 (td,  $J = 6.2, 1.6$  Hz, 4H), 3.83 (s, 2H), 3.68 – 3.63 (m, 4H), 1.81 – 1.73 (m, 4H).  $^{13}\text{C}$  NMR (101 MHz, Chloroform-*d*)  $\delta$  184.21, 180.65, 156.55, 138.25, 133.91, 133.72, 131.78, 131.64, 128.98, 128.18, 126.90, 126.06, 125.69, 106.69, 54.32, 40.13, 25.46. HRMS Calcd for  $\text{C}_{21}\text{H}_{20}\text{NO}_2\text{S}$  [ $\text{M} + \text{H}$ ] $^+$ :  $m/z$  350.1209, found: 350.1205.

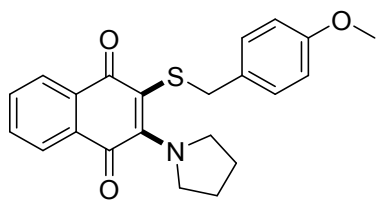

2-((4-methoxybenzyl)thio)-3-(pyrrolidin-1-yl)naphthalene-1,4-dione (**4n**)

Red solid, 35% yield (65 mg), mp 58.5-60.3 °C; <sup>1</sup>H NMR (400 MHz, Chloroform-*d*) δ 8.09 (dd, *J* = 7.7, 1.2 Hz, 1H), 7.84 (dd, *J* = 7.6, 1.2 Hz, 1H), 7.67 (td, *J* = 7.6, 1.3 Hz, 1H), 7.56 (td, *J* = 7.5, 1.3 Hz, 1H), 7.12 – 7.04 (m, 2H), 6.79 – 6.71 (m, 2H), 3.79 (s, 2H), 3.75 (s, 3H), 3.73 – 3.67 (m, 4H), 1.84 – 1.78 (m, 4H). <sup>13</sup>C NMR (101 MHz, Chloroform-*d*) δ 184.24, 180.73, 158.54, 156.45, 133.92, 133.72, 131.80, 131.65, 130.22, 130.11, 126.08, 125.68, 113.62, 107.06, 55.33, 54.31, 39.51, 25.50. HRMS Calcd for C<sub>22</sub>H<sub>22</sub>NO<sub>3</sub>S [M + H]<sup>+</sup>: m/z 380.1315, found: 380.1315.

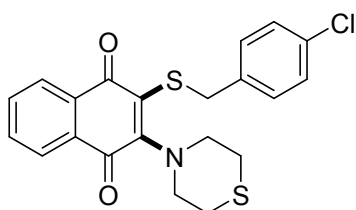

2-((4-chlorobenzyl)thio)-3-thiomorpholinonaphthalene-1,4-dione (**4o**)

Red solid, 35% yield (73 mg), mp 37.8-39.2 °C; <sup>1</sup>H NMR (400 MHz, Chloroform-*d*) δ 8.08 (dd, *J* = 7.2, 1.7 Hz, 1H), 7.98 – 7.93 (m, 1H), 7.67 (dtd, *J* = 16.8, 7.4, 1.6 Hz, 2H), 7.19 – 7.14 (m, 2H), 7.13 – 7.08 (m, 2H), 4.09 (s, 2H), 3.56 – 3.51 (m, 4H), 2.75 – 2.70 (m, 4H). <sup>13</sup>C NMR (101 MHz, Chloroform-*d*) δ 181.80, 181.66, 156.45, 136.56, 133.83, 133.06, 132.92, 132.74, 131.93, 130.25, 128.49, 126.70, 126.34, 125.28, 55.06, 38.27, 28.04. HRMS calcd for C<sub>21</sub>H<sub>19</sub>NO<sub>2</sub>S<sub>2</sub> [M + H]<sup>+</sup>: m/z 416.0540, found: 416.0542.

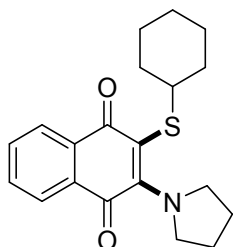

2-(cyclohexylthio)-3-(pyrrolidin-1-yl)naphthalene-1,4-dione (**4p**)

Red solid, 71% yield (121 mg), mp 48.6-49.8 °C; <sup>1</sup>H NMR (400 MHz, Chloroform-*d*) δ 8.07 (dd, *J* = 7.7, 1.2 Hz, 1H), 7.87 (dd, *J* = 7.6, 1.3 Hz, 1H), 7.66 (td, *J* = 7.5, 1.4 Hz, 1H), 7.56 (td, *J* = 7.5, 1.3 Hz, 1H), 3.98 – 3.84 (m, 4H), 2.87 (m, *J* = 10.4, 3.7 Hz, 1H), 2.00 – 1.90 (m, 4H), 1.88 – 1.82 (m, 2H), 1.71 (m, *J* = 6.3, 3.8 Hz, 2H), 1.56 (m, *J* = 9.4, 3.9 Hz, 1H), 1.31 – 1.16 (m, 5H). <sup>13</sup>C NMR (101 MHz, Chloroform-*d*) δ 184.56, 180.98, 156.27, 133.84, 133.54, 131.89, 131.68, 126.13, 125.59, 108.35, 54.36, 46.05, 32.85, 26.10, 25.90, 25.65. HRMS calcd for C<sub>20</sub>H<sub>24</sub>NO<sub>2</sub>S [M + H]<sup>+</sup>: m/z 342.1522, found: 342.1521.

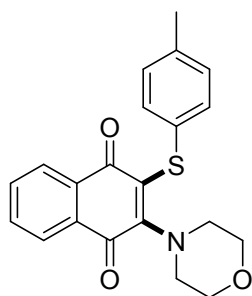

2-morpholino-3-(*p*-tolylthio)naphthalene-1,4-dione (**4q**)

Red solid, 55% yield (100 mg), mp 139.0-140.2 °C; <sup>1</sup>H NMR (400 MHz, Chloroform-*d*) δ 8.10 – 7.97 (m, 2H), 7.67 (dt, *J* = 5.9, 2.3 Hz, 2H), 7.16 (d, *J* = 7.9 Hz, 2H), 7.05 (d, *J* = 7.9 Hz, 2H), 3.75 (t, *J* = 4.6 Hz, 4H), 3.44 (t, *J* = 4.5 Hz, 4H), 2.30 (s, 3H). <sup>13</sup>C NMR (101 MHz, Chloroform-*d*) δ 182.07, 181.91, 153.09, 136.49, 133.97, 132.98, 132.57, 132.19, 132.05, 129.79, 128.17, 126.75, 126.56, 122.11, 67.45, 51.81, 21.07. HRMS Calcd for C<sub>21</sub>H<sub>20</sub>NO<sub>3</sub>S [M + H]<sup>+</sup>: m/z 366.1158, found: 366.1166.

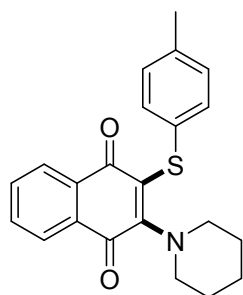

2-(piperidin-1-yl)-3-(*p*-tolylthio)naphthalene-1,4-dione (**4r**)

Red solid, 75% yield (136 mg), mp 69.0-71.0 °C; <sup>1</sup>H NMR (400 MHz, Chloroform-*d*) δ 8.09 – 7.97 (m, 2H), 7.70 – 7.61 (m, 2H), 7.19 – 7.12 (m, 2H), 7.03 (d, *J* = 8.0 Hz, 2H), 3.40 (t, *J* = 5.4 Hz, 2H), 2.29 (s, 3H), 1.70 (m, *J* = 5.7 Hz, 4H), 1.61 (q, *J* = 6.6, 6.2 Hz, 4H). <sup>13</sup>C NMR (101 MHz, Chloroform-*d*) δ 182.37, 181.69, 155.01, 135.92, 133.78, 133.19, 132.72 (d, *J* = 15.6 Hz), 132.24, 129.63, 127.93, 126.63, 126.44, 120.00, 53.38, 26.87, 24.10, 21.06. HRMS calcd for C<sub>22</sub>H<sub>22</sub>NO<sub>2</sub>S [M + H]<sup>+</sup>: m/z 364.1366, found: 364.1360.

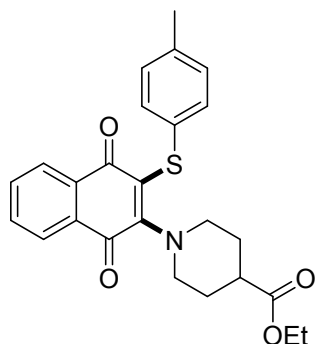

Ethyl 1-(1,4-dioxo-3-(*p*-tolylthio)-1,4-dihydronaphthalen-2-yl)piperidine-4-carboxylate (**4s**)

Red solid, 44% yield (95 mg), mp 73.1-75.0 °C; <sup>1</sup>H NMR (400 MHz, Chloroform-*d*) δ 8.08 – 7.98 (m, 2H), 7.71 – 7.61 (m, 2H), 7.20 – 7.12 (m, 2H), 7.04 (d, *J* = 8.0 Hz, 2H), 4.13 (m, *J* = 7.1 Hz, 2H), 3.76 (dt, *J* = 14.1, 4.1 Hz, 2H), 3.04 (ddd, *J* = 13.7, 9.7, 4.3 Hz, 2H), 2.45 (m, *J* = 9.9, 5.2 Hz, 1H), 2.29 (s, 3H), 1.93 (m, *J* = 7.2, 3.8 Hz, 4H), 1.25 (t, *J* = 7.1 Hz, 3H). <sup>13</sup>C NMR (101 MHz,

Chloroform-*d*)  $\delta$  182.08, 181.85, 174.36, 154.23, 136.31, 133.85, 132.86, 132.67, 132.13, 129.69, 128.25, 126.71, 126.51, 122.23, 60.54, 51.33, 40.70, 28.89, 21.06, 14.24. HRMS Calcd for  $C_{25}H_{26}NO_4S$   $[M + H]^+$ :  $m/z$  436.1577, found: 436.1581.

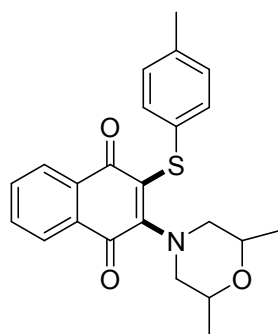

2-(2,6-dimethylmorpholino)-3-(*p*-tolylthio)naphthalene-1,4-dione (**4t**)

Red solid, 82% yield (161 mg), mp 79.2-80.2 °C;  $^1H$  NMR (400 MHz, Chloroform-*d*)  $\delta$  8.09 – 8.03 (m, 1H), 8.04 – 7.99 (m, 1H), 7.71 – 7.62 (m, 2H), 7.18 – 7.13 (m, 2H), 7.04 (d,  $J = 8.0$  Hz, 2H), 3.79 (m,  $J = 10.2, 6.3, 2.0$  Hz, 2H), 3.72 – 3.65 (m, 2H), 2.72 (dd,  $J = 13.1, 10.2$  Hz, 2H), 2.30 (s, 3H), 1.14 (d,  $J = 6.2$  Hz, 6H).  $^{13}C$  NMR (101 MHz, Chloroform-*d*)  $\delta$  182.18, 181.86, 152.95, 136.42, 133.95, 132.92, 132.62, 132.23, 132.07, 129.75, 128.21, 126.70, 126.53, 121.64, 72.37, 56.93, 21.07, 18.60. HRMS calcd for  $C_{23}H_{24}NO_3S$   $[M + H]^+$ :  $m/z$  394.1471, found: 394.1474.

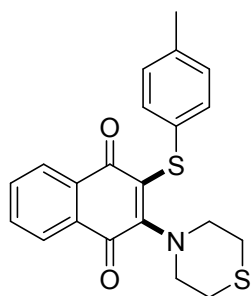

2-thiomorpholino-3-(*p*-tolylthio)naphthalene-1,4-dione (**4u**)

Red solid, 45% yield (86 mg), mp 149.0-150.0 °C;  $^1H$  NMR (400 MHz, Chloroform-*d*)  $\delta$  8.08 – 7.99 (m, 2H), 7.71 – 7.64 (m, 2H), 7.21 – 7.16 (m, 2H), 7.06 (d,  $J = 8.0$  Hz, 2H), 3.60 – 3.47 (m, 4H), 2.79 – 2.69 (m, 4H), 2.31 (s, 3H).  $^{13}C$  NMR (101 MHz, Chloroform-*d*)  $\delta$  182.17, 182.01, 153.56, 136.85, 133.90, 133.10, 132.49, 132.02, 131.85, 129.80, 128.70, 126.77, 126.54, 124.75, 53.66, 28.10, 21.12. HRMS Calcd for  $C_{21}H_{19}NO_2S_2Na$   $[M + Na]^+$ :  $m/z$  404.0749, found: 404.0756.

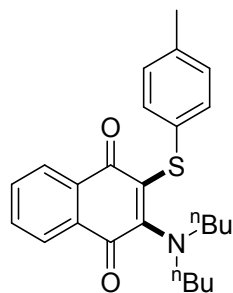

2-(dibutylamino)-3-(*p*-tolylthio)naphthalene-1,4-dione (**4v**)

Red solid, 40% yield (82 mg), mp 50.2-51.6 °C;  $^1H$  NMR (400 MHz, Chloroform-*d*)  $\delta$  8.08 – 8.02

(m, 1H), 8.01 – 7.96 (m, 1H), 7.65 (m,  $J = 7.4, 5.7$  Hz, 2H), 7.19 – 7.12 (m, 2H), 7.02 (d,  $J = 8.1$  Hz, 2H), 3.50 – 3.41 (m, 4H), 2.28 (s, 3H), 1.46 – 1.31 (m, 4H), 1.24 (dt,  $J = 15.0, 7.4$  Hz, 4H), 0.84 (t,  $J = 7.3$  Hz, 6H).  $^{13}\text{C}$  NMR (101 MHz, Chloroform-*d*)  $\delta$  183.18, 181.44, 154.96, 136.17, 133.67, 132.99, 132.89, 132.57, 132.44, 129.67, 128.68, 126.49, 126.40, 120.91, 53.14, 30.75, 21.02, 20.03, 13.86. HRMS calcd for  $\text{C}_{25}\text{H}_{30}\text{NO}_2\text{S}$   $[\text{M} + \text{H}]^+$ :  $m/z$  408.1992, found: 408.1991.

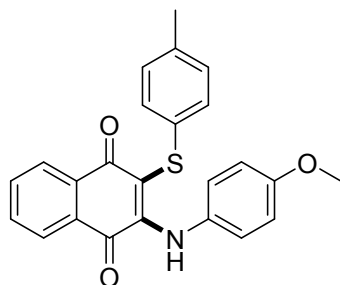

2-((4-methoxyphenyl)amino)-3-(*p*-tolylthio)naphthalene-1,4-dione (**4w**)

Red solid, 40% yield (80 mg), mp 51.6-52.8 °C;  $^1\text{H}$  NMR (400 MHz, Chloroform-*d*)  $\delta$  8.17 (dd,  $J = 7.7, 1.3$  Hz, 1H), 8.10 (dd,  $J = 7.6, 1.4$  Hz, 1H), 7.89 (s, 1H), 7.74 (td,  $J = 7.6, 1.4$  Hz, 1H), 7.67 (td,  $J = 7.5, 1.3$  Hz, 1H), 6.87 (d,  $J = 7.8$  Hz, 2H), 6.75 – 6.66 (m, 6H), 3.81 (s, 3H), 2.24 (s, 3H).  $^{13}\text{C}$  NMR (101 MHz, Chloroform-*d*)  $\delta$  180.96, 157.17, 143.75, 135.70, 134.84, 133.62, 132.66, 130.60, 130.49, 130.03, 129.19, 128.20, 127.09, 126.72, 124.79, 113.13, 111.91, 55.56, 21.02. HRMS calcd for  $\text{C}_{24}\text{H}_{20}\text{NO}_3\text{S}$   $[\text{M} + \text{H}]^+$ :  $m/z$  402.1158, found: 402.1158.

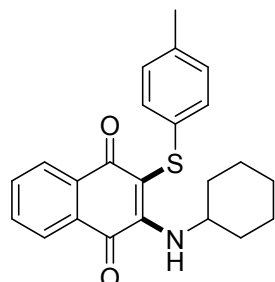

2-(cyclohexylamino)-3-(*p*-tolylthio)naphthalene-1,4-dione (**4x**)

Red solid, 55% yield (103 mg), mp 93.5-95.0 °C;  $^1\text{H}$  NMR (400 MHz, Chloroform-*d*)  $\delta$  8.14 (dd,  $J = 7.7, 1.2$  Hz, 1H), 8.04 (dd,  $J = 7.8, 1.3$  Hz, 1H), 7.70 (td,  $J = 7.5, 1.4$  Hz, 1H), 7.60 (td,  $J = 7.5, 1.3$  Hz, 1H), 7.13 (d,  $J = 8.2$  Hz, 2H), 7.02 (d,  $J = 8.0$  Hz, 2H), 6.54 (d,  $J = 9.0$  Hz, 1H), 4.60 (s, 1H), 2.26 (s, 3H), 1.98 – 1.88 (m, 2H), 1.70 (m,  $J = 12.7, 3.8$  Hz, 2H), 1.60 (m,  $J = 12.6, 3.7$  Hz, 1H), 1.36 – 1.13 (m, 5H).  $^{13}\text{C}$  NMR (101 MHz, Chloroform-*d*)  $\delta$  181.60, 179.87, 149.11, 135.30, 134.88, 133.81, 132.08, 130.45, 129.76, 129.54, 127.55, 127.05, 126.57, 126.34, 52.88, 34.13, 25.29, 24.48, 20.93. HRMS calcd for  $\text{C}_{23}\text{H}_{24}\text{NO}_2\text{S}$   $[\text{M} + \text{H}]^+$ :  $m/z$  378.1522, found: 378.1525.

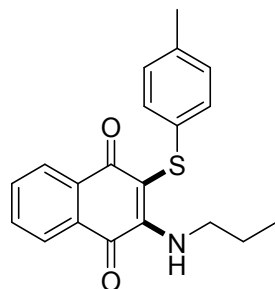

2-(propylamino)-3-(*p*-tolylthio)naphthalene-1,4-dione (**4y**)

Red solid, 55% yield (93 mg), mp 133.0-134.0 °C;  $^1\text{H}$  NMR (400 MHz, Chloroform-*d*)  $\delta$  8.16 (dd,

$J = 7.6, 1.2$  Hz, 1H), 8.07 (dd,  $J = 7.7, 1.4$  Hz, 1H), 7.72 (td,  $J = 7.6, 1.4$  Hz, 1H), 7.63 (td,  $J = 7.5, 1.3$  Hz, 1H), 7.13 (d,  $J = 8.3$  Hz, 2H), 7.06 – 6.99 (m, 2H), 6.59 (s, 1H), 3.88 – 3.79 (m, 2H), 2.26 (s, 3H), 1.70 – 1.57 (m, 3H), 0.94 (t,  $J = 7.4$  Hz, 3H).  $^{13}\text{C}$  NMR (101 MHz, Chloroform-*d*)  $\delta$  181.60, 180.00, 150.41, 135.31, 134.98, 133.82, 132.16, 130.44, 129.83, 129.55, 127.15, 126.83, 126.61, 47.03, 23.79, 20.95, 11.15. HRMS calcd for  $\text{C}_{20}\text{H}_{20}\text{NO}_2\text{S}$  [ $\text{M} + \text{H}$ ] $^+$ :  $m/z$  338.1209, found: 338.1209.

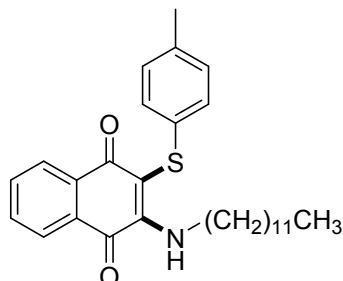

2-(dodecylamino)-3-(*p*-tolylthio)naphthalene-1,4-dione (**4z**)

Red solid, 65% yield (151 mg), mp 61.9-62.8 °C;  $^1\text{H}$  NMR (400 MHz, Chloroform-*d*)  $\delta$  8.17 (dd,  $J = 7.7, 1.3$  Hz, 1H), 8.07 (dd,  $J = 7.7, 1.3$  Hz, 1H), 7.73 (td,  $J = 7.6, 1.4$  Hz, 1H), 7.63 (td,  $J = 7.6, 1.3$  Hz, 1H), 7.12 (d,  $J = 8.2$  Hz, 2H), 7.03 (d,  $J = 8.0$  Hz, 2H), 6.57 (s, 1H), 3.86 (q,  $J = 6.8$  Hz, 2H), 2.26 (s, 3H), 1.60 (m,  $J = 7.1$  Hz, 2H), 1.36 – 1.17 (m, 18H), 0.88 (t,  $J = 6.8$  Hz, 3H).  $^{13}\text{C}$  NMR (101 MHz, Chloroform-*d*)  $\delta$  181.60, 179.99, 150.24, 135.23, 134.96, 133.83, 132.12, 130.41, 130.10, 129.81, 127.14, 126.77, 126.59, 45.64, 31.91, 30.46, 29.62, 29.54, 29.50, 29.46, 29.34, 29.18, 26.62, 22.85, 22.69, 20.92, 14.13. HRMS calcd for  $\text{C}_{29}\text{H}_{38}\text{NO}_2\text{S}$  [ $\text{M} + \text{H}$ ] $^+$ :  $m/z$  464.2618, found: 464.2618.

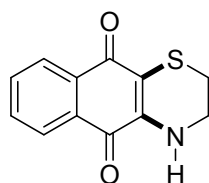

3,4-dihydro-2H-naphtho[2,3-*b*][1,4]thiazine-5,10-dione (**6a**)

Purple solid, 85% yield (98 mg), mp 236.1-237.9 °C;  $^1\text{H}$  NMR (400 MHz, Chloroform-*d*)  $\delta$  8.05 (dd,  $J = 7.6, 1.3$  Hz, 1H), 7.98 (dd,  $J = 7.7, 1.4$  Hz, 1H), 7.66 (td,  $J = 7.6, 1.4$  Hz, 1H), 7.58 (td,  $J = 7.6, 1.4$  Hz, 1H), 6.02 (s, 1H), 3.81 – 3.75 (m, 2H), 3.05 – 2.98 (m, 2H).  $^{13}\text{C}$  NMR (101 MHz, Chloroform-*d*)  $\delta$  179.32, 177.93, 140.93, 134.25, 133.14, 132.33, 130.30, 126.32, 126.20, 111.40, 41.72, 23.93. HRMS calcd for  $\text{C}_{12}\text{H}_{10}\text{NO}_2\text{S}$  [ $\text{M} + \text{H}$ ] $^+$ :  $m/z$  232.0427, found: 232.0437.

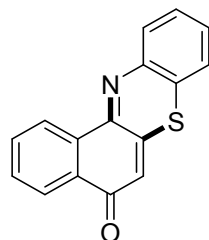

5H-benzo[*a*]phenothiazin-5-one (**6b**)

Yellow solid, 64% yield (84 mg), mp 176.0-177.5 °C;  $^1\text{H}$  NMR (400 MHz, Chloroform-*d*)  $\delta$  8.81 – 8.73 (m, 1H), 8.27 – 8.20 (m, 1H), 7.84 (dd,  $J = 7.8, 1.6$  Hz, 1H), 7.70 (ddd,  $J = 6.8, 4.5, 1.9$  Hz, 2H), 7.46 – 7.35 (m, 1H), 7.39 – 7.29 (m, 2H), 6.76 (s, 1H).  $^{13}\text{C}$  NMR (101 MHz, Chloroform-*d*)  $\delta$  180.23, 144.73, 138.58, 137.82, 134.21, 133.38, 132.59, 131.65, 131.33, 129.98, 127.75, 125.77,

125.60, 124.68, 122.91, 120.25. HRMS calcd for C<sub>16</sub>H<sub>10</sub>NOS [M + H]<sup>+</sup>: m/z 264.0478, found: 264.0477.

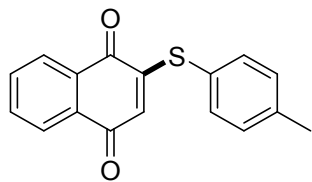

2-(*p*-tolylthio)naphthalene-1,4-dione (7)

Yellow solid, 70% yield (98 mg), mp 115.0-117.0 °C; <sup>1</sup>H NMR (400 MHz, Chloroform-*d*) δ 8.13 – 8.06 (m, 1H), 7.99 (m, *J* = 6.7, 2.2 Hz, 1H), 7.75 – 7.65 (m, 2H), 7.41 (dd, *J* = 8.1, 1.6 Hz, 2H), 7.33 – 7.25 (m, 2H), 6.09 (d, *J* = 1.8 Hz, 1H), 2.42 (d, *J* = 1.5 Hz, 3H). <sup>13</sup>C NMR (101 MHz, Chloroform-*d*) δ 182.12, 181.90, 157.03, 140.95, 135.56, 134.30, 133.28, 132.20, 131.72, 131.17, 128.06, 126.77, 126.46, 123.71, 21.40. HRMS calcd for C<sub>17</sub>H<sub>12</sub>NaO<sub>2</sub>S [M + Na]<sup>+</sup>: m/z 303.0450, found: 303.0448.

## 7. <sup>1</sup>H, <sup>13</sup>C and <sup>19</sup>F NMR spectra

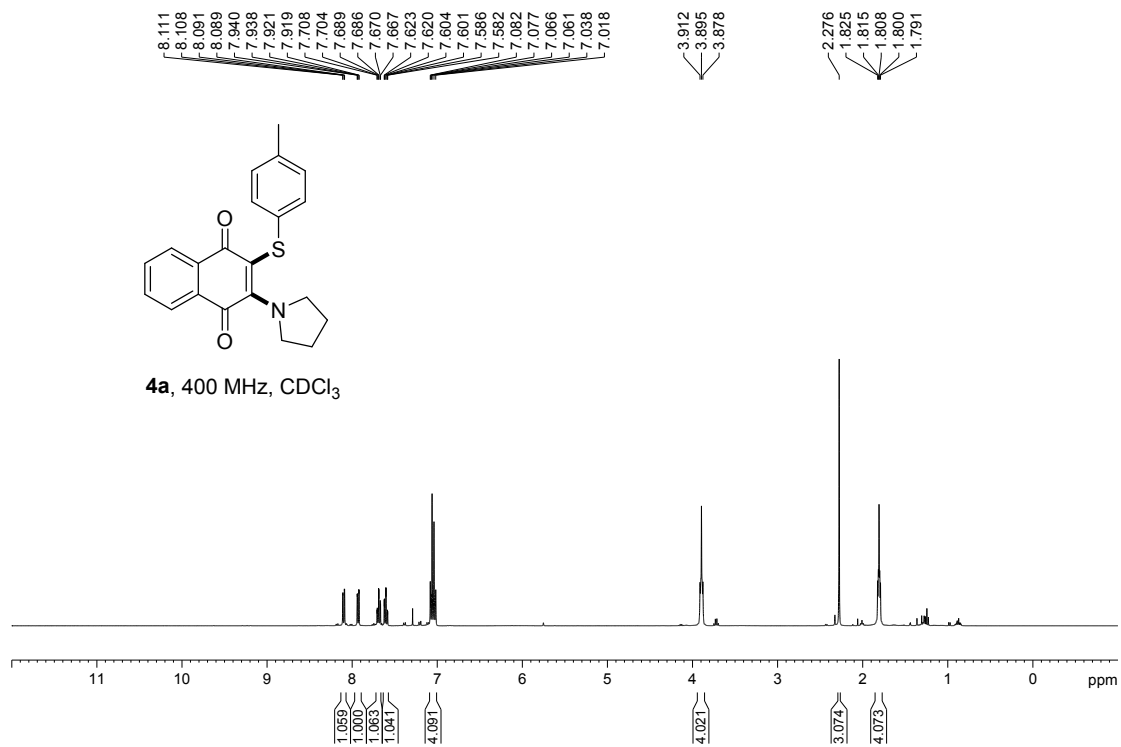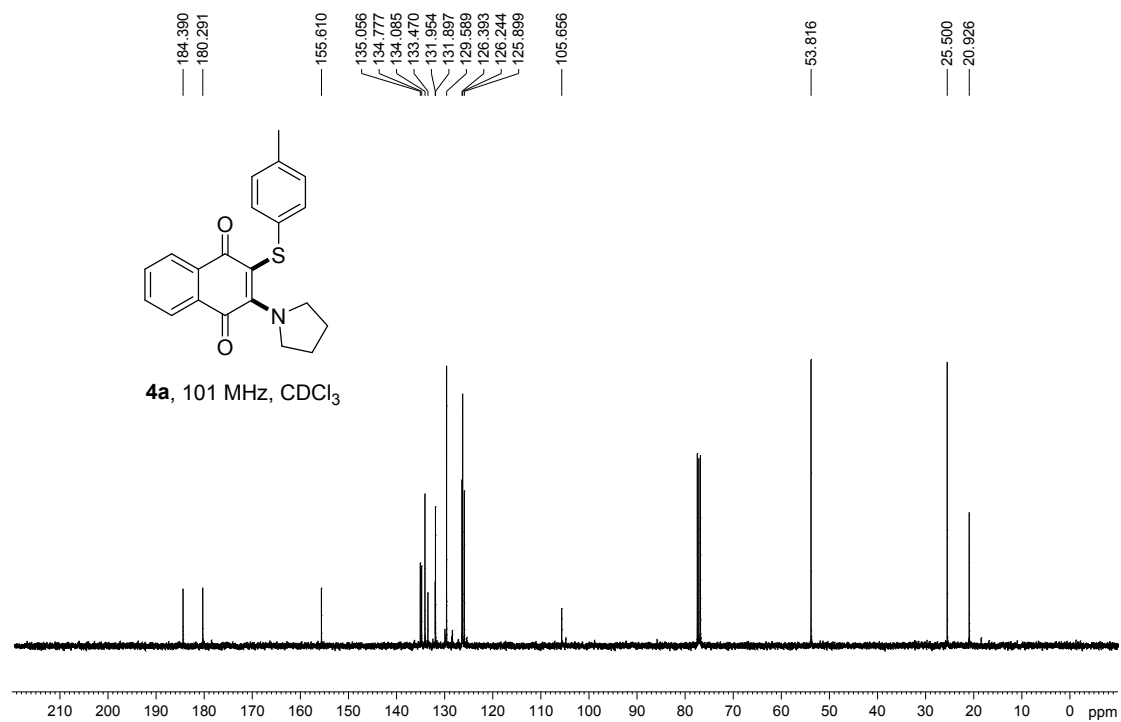



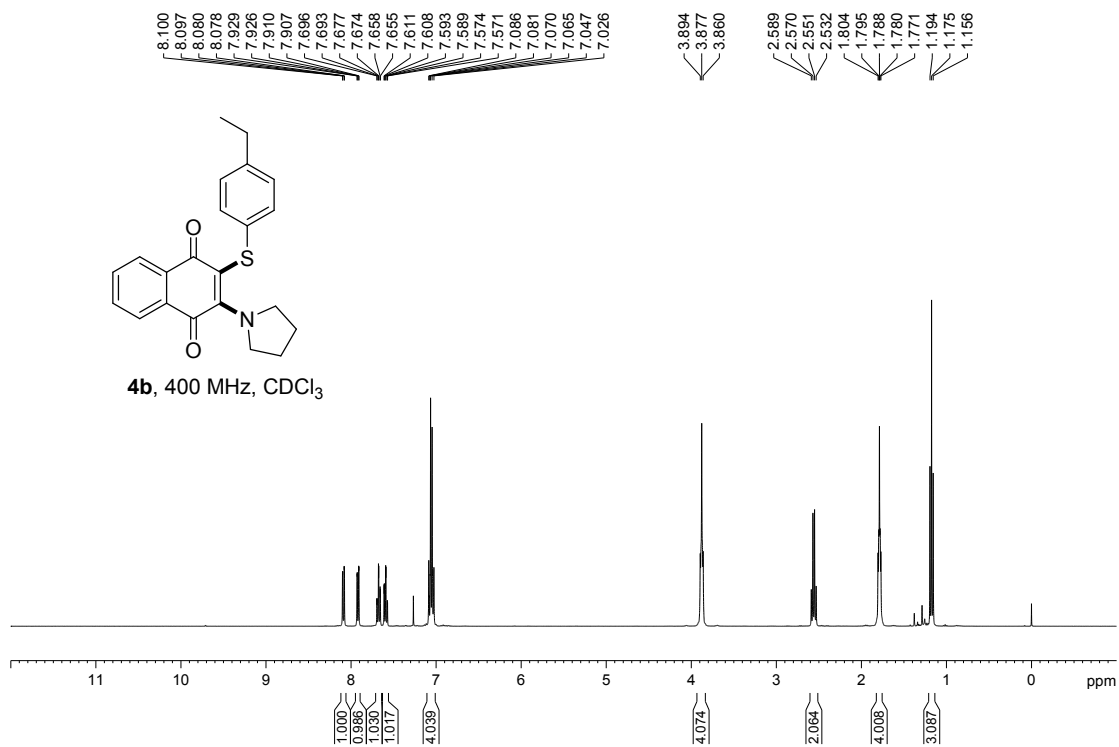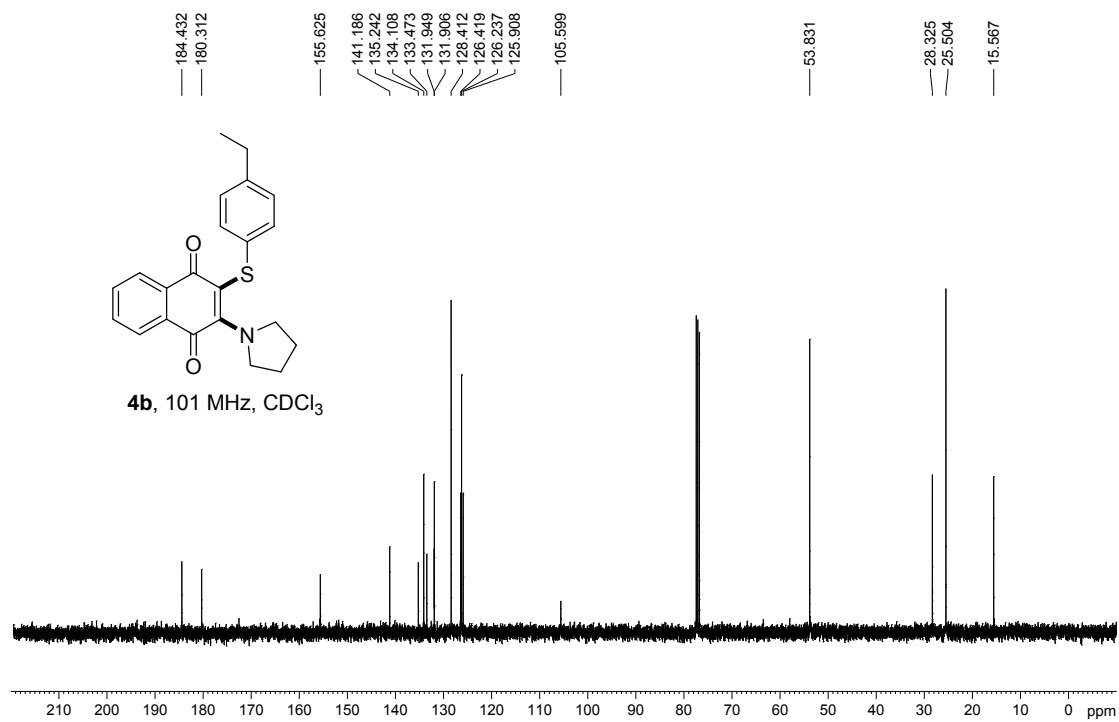

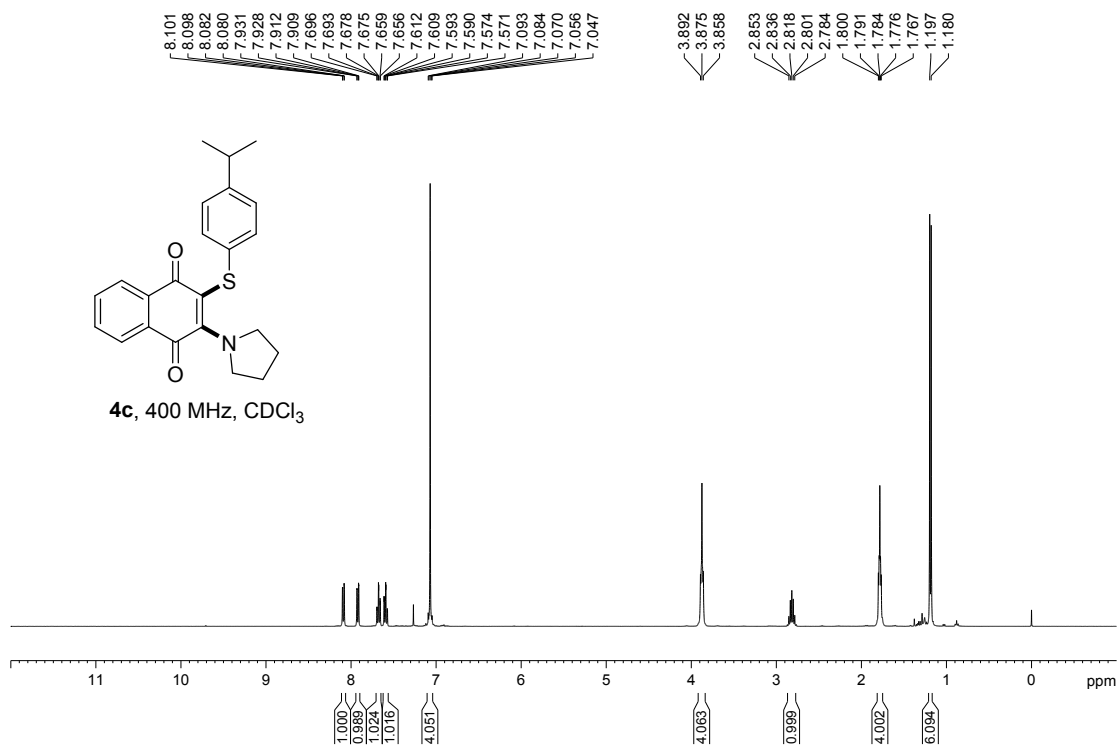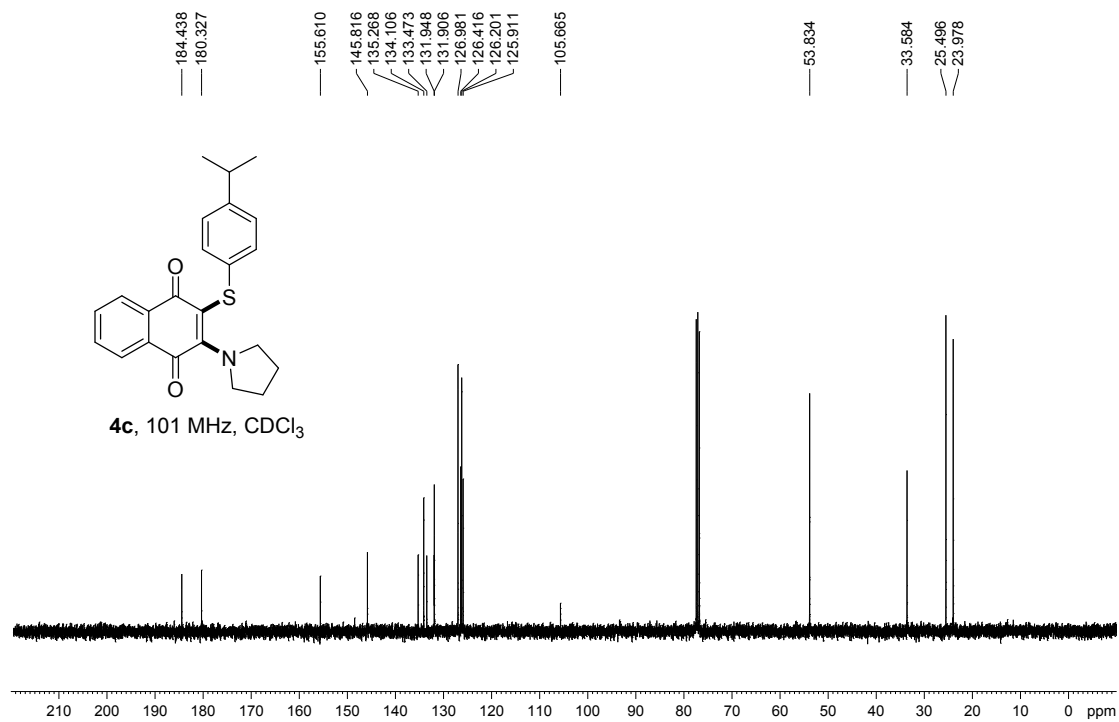

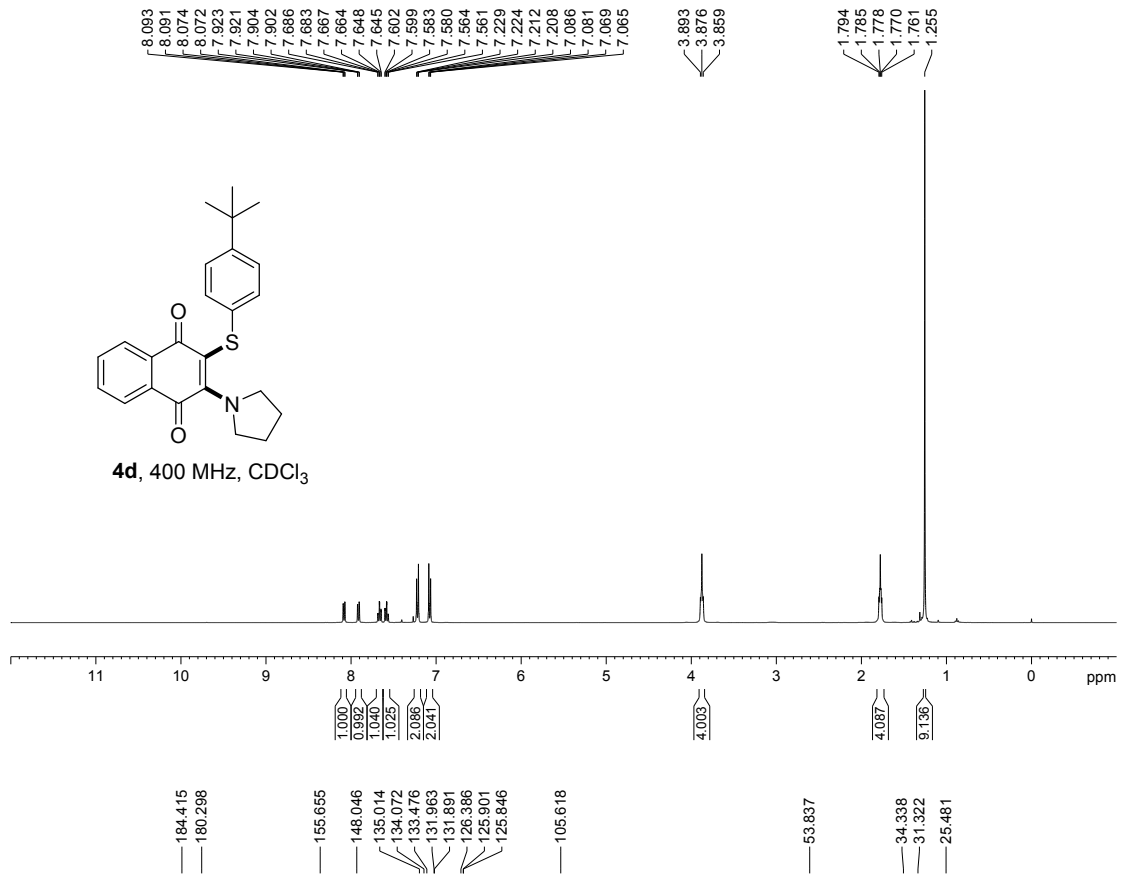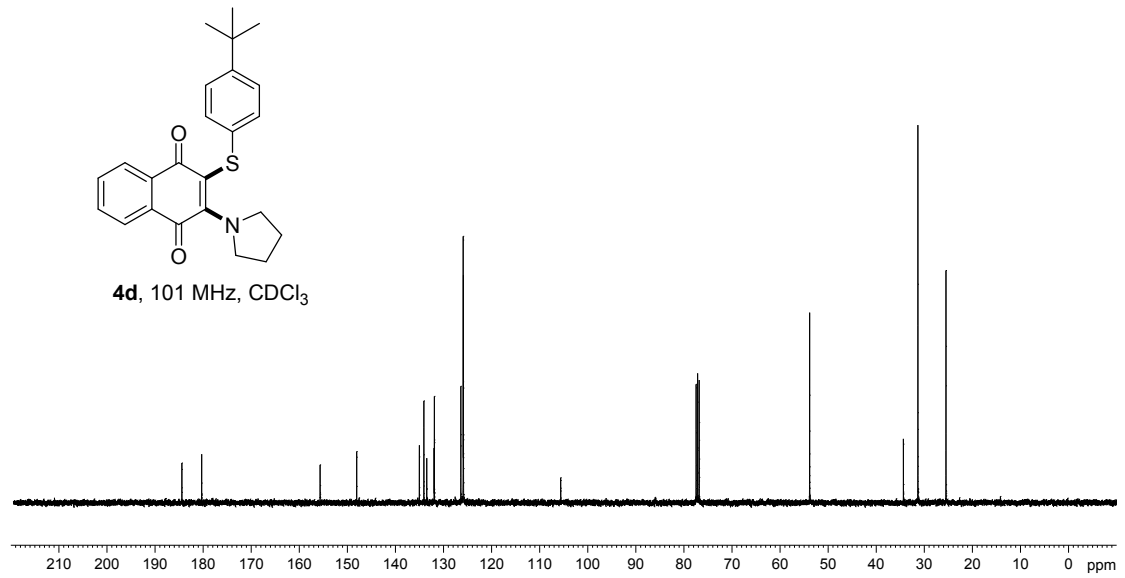

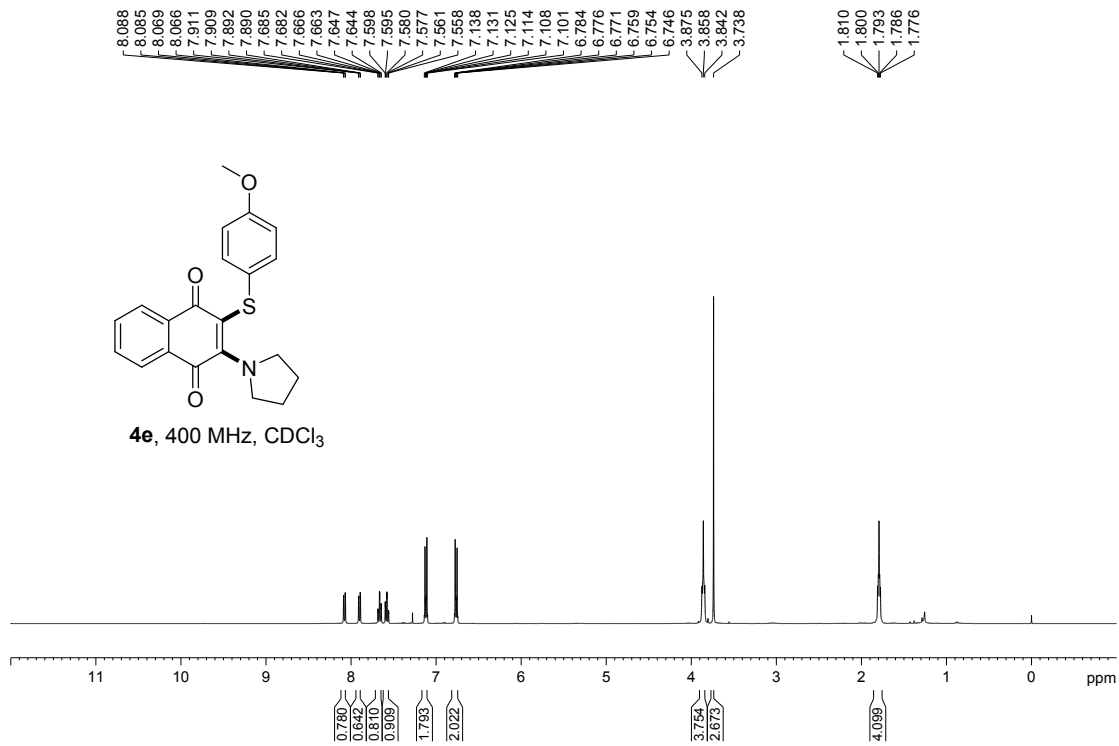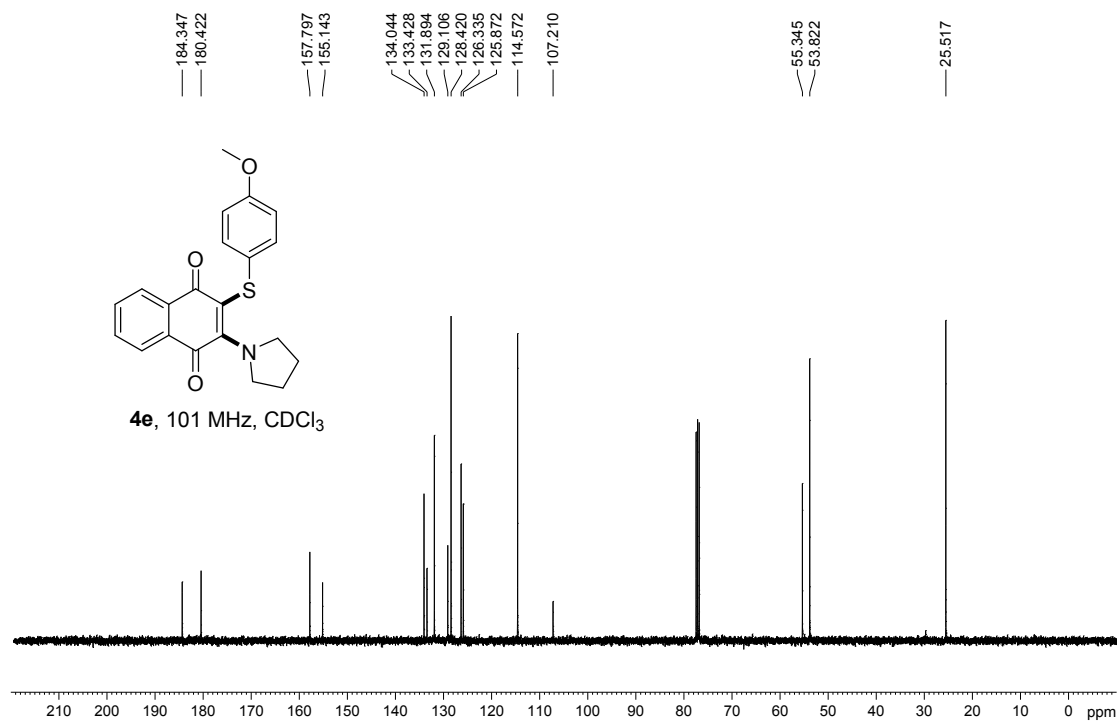

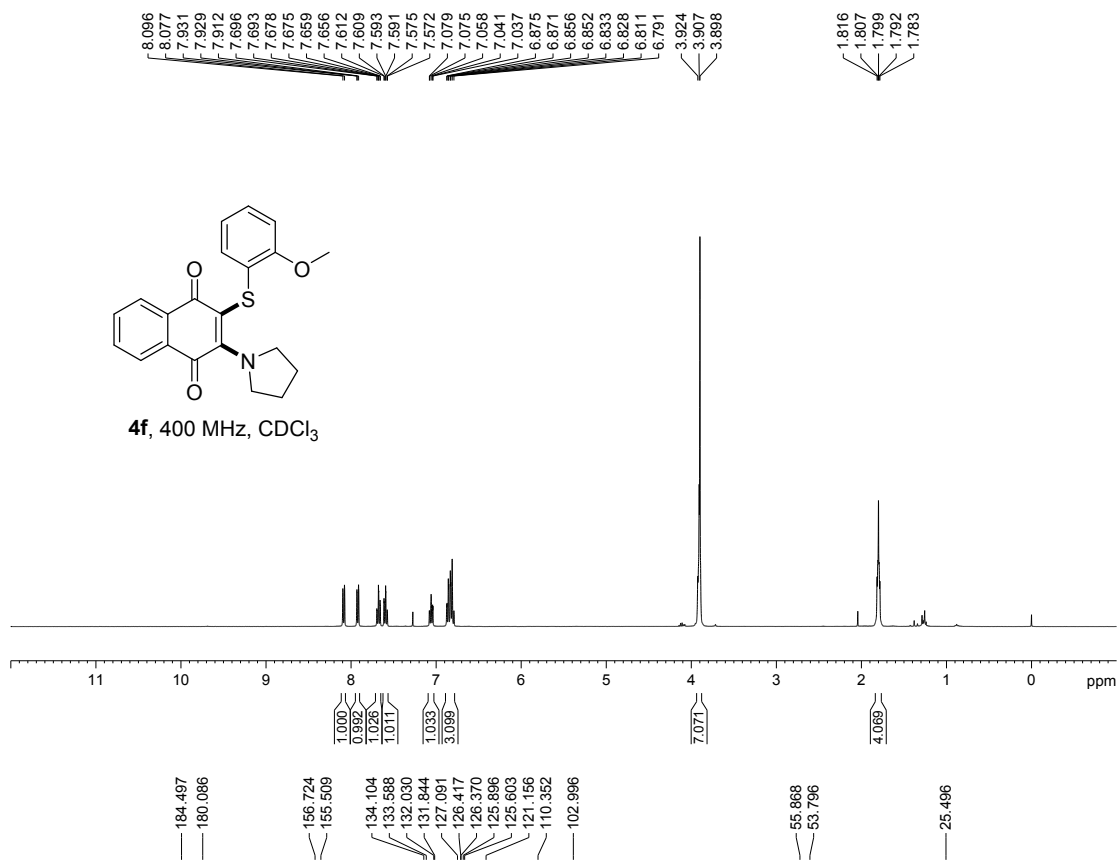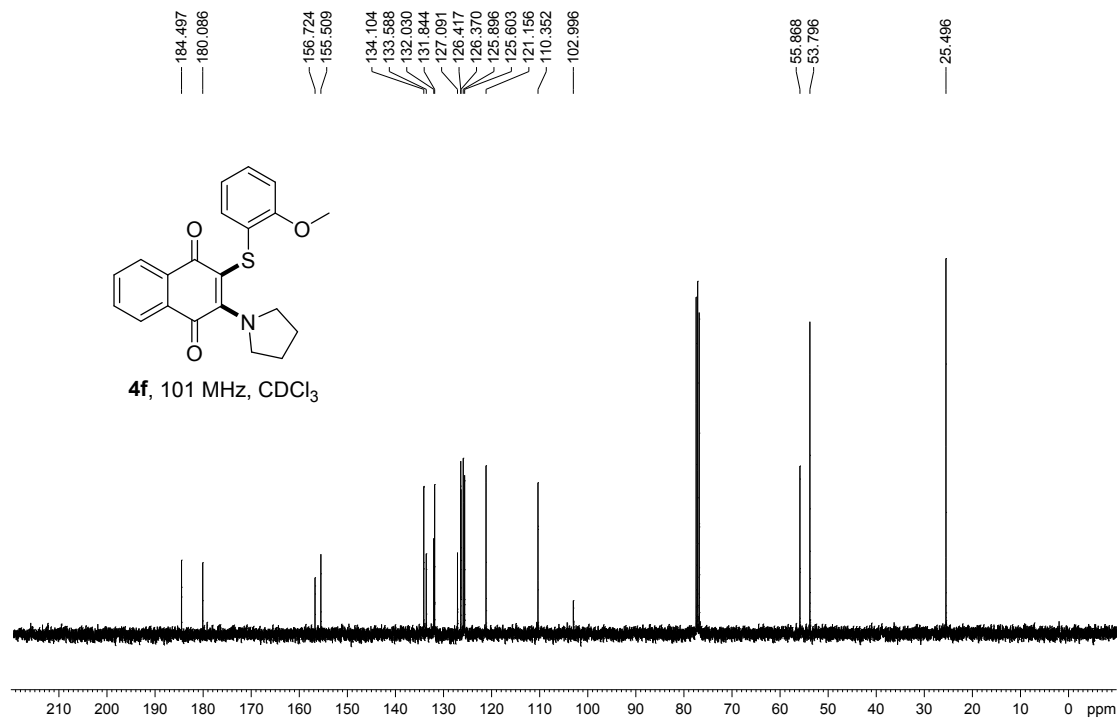

8.076  
8.074  
8.057  
8.055  
7.920  
7.918  
7.902  
7.899  
7.702  
7.699  
7.684  
7.680  
7.665  
7.662  
7.617  
7.614  
7.598  
7.595  
7.580  
7.576  
7.323  
7.316  
7.312  
7.300  
7.295  
7.288  
7.032  
7.025  
7.020  
7.008  
7.003  
6.997  
3.909  
3.892  
3.875

1.848  
1.839  
1.831  
1.824  
1.814

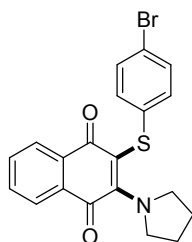

**4g**, 400 MHz, CDCl<sub>3</sub>

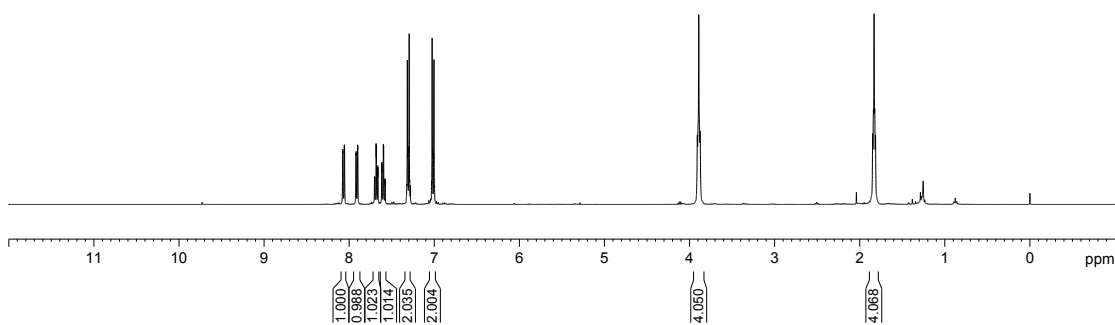

184.285  
179.989

156.434

138.387

134.269

133.320

132.058

131.916

131.774

127.404

126.415

126.029

118.339

103.340

54.079

25.491

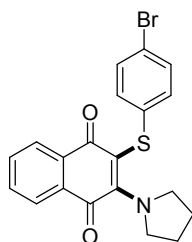

**4g**, 101 MHz, CDCl<sub>3</sub>

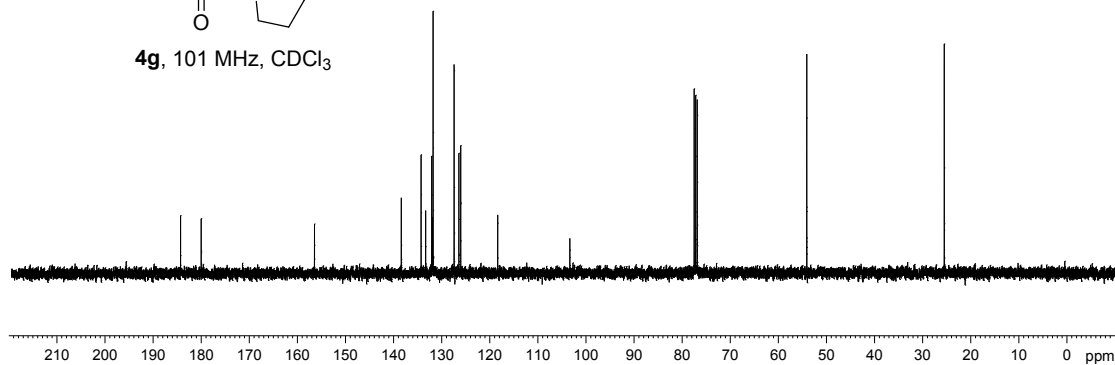

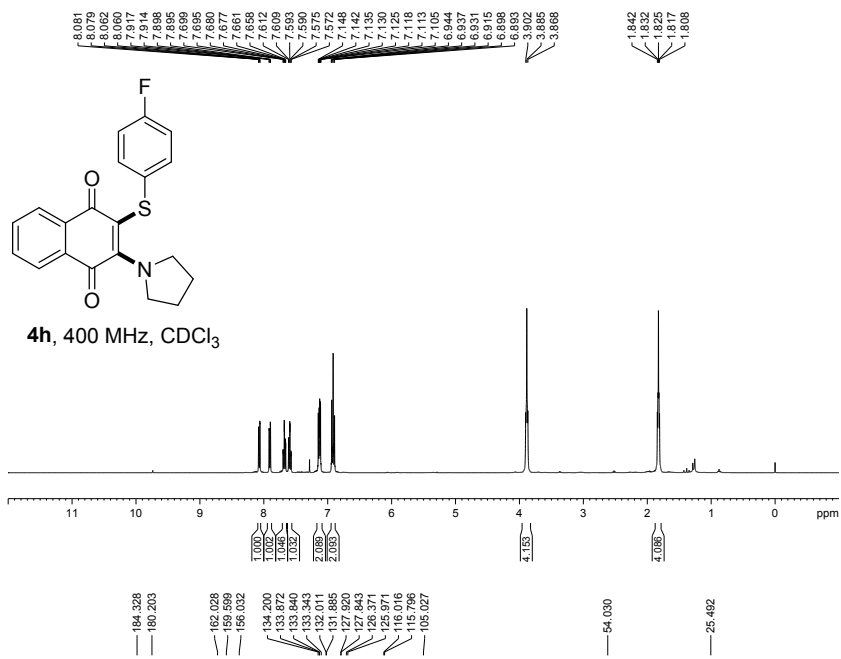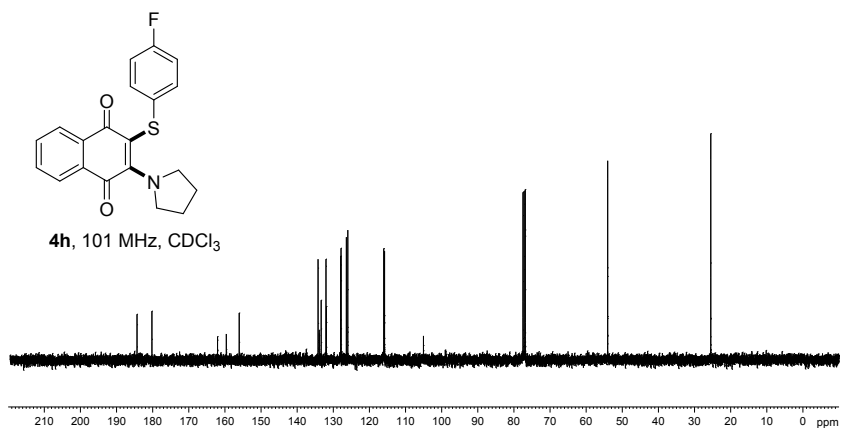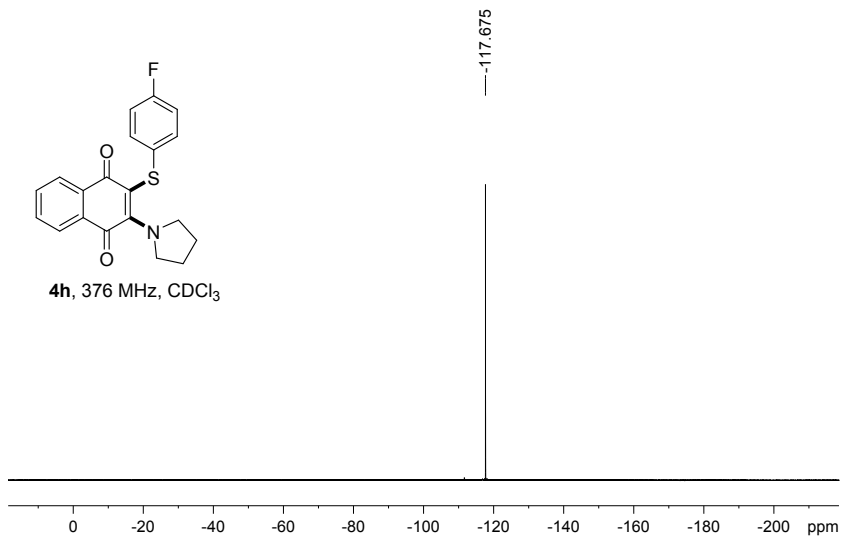

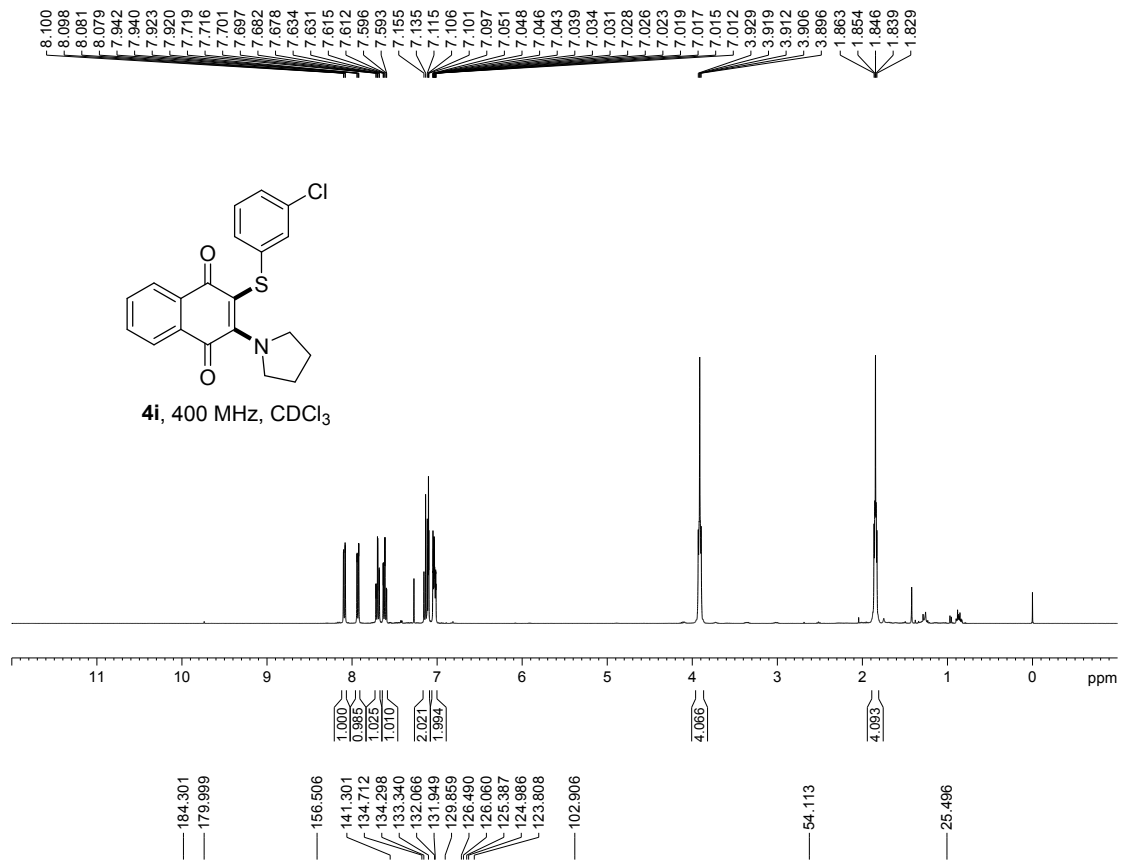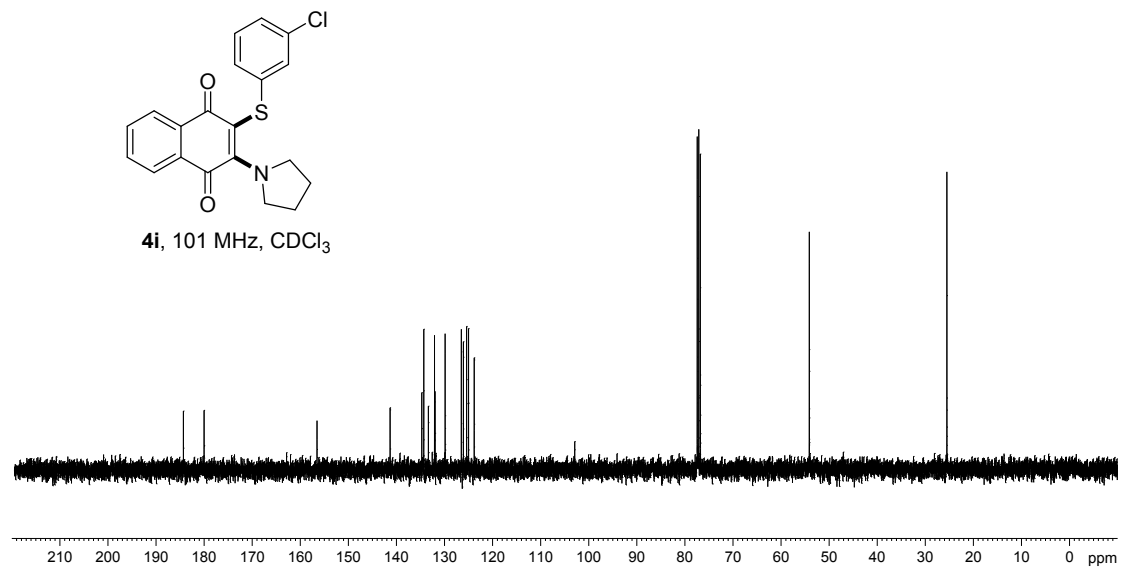



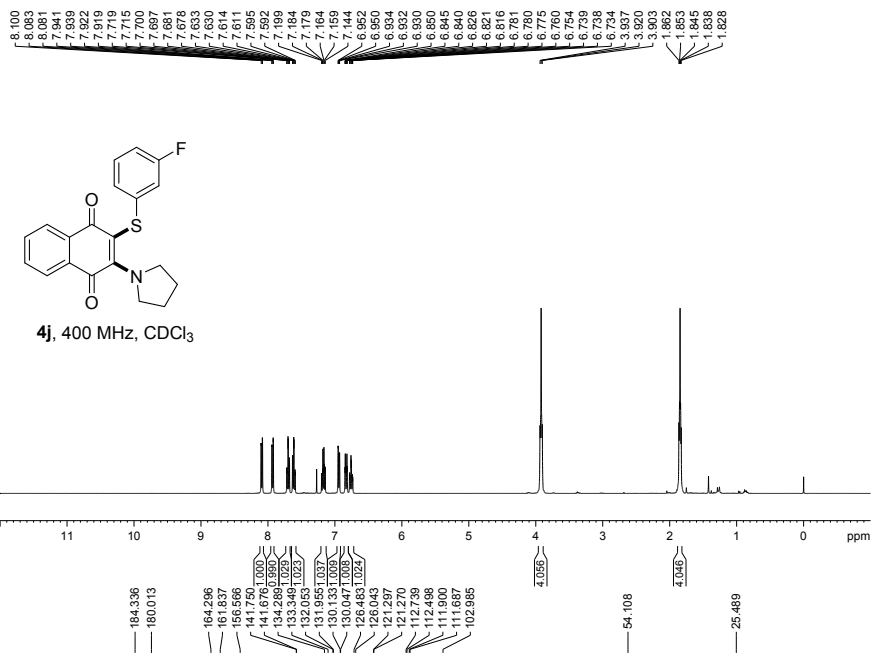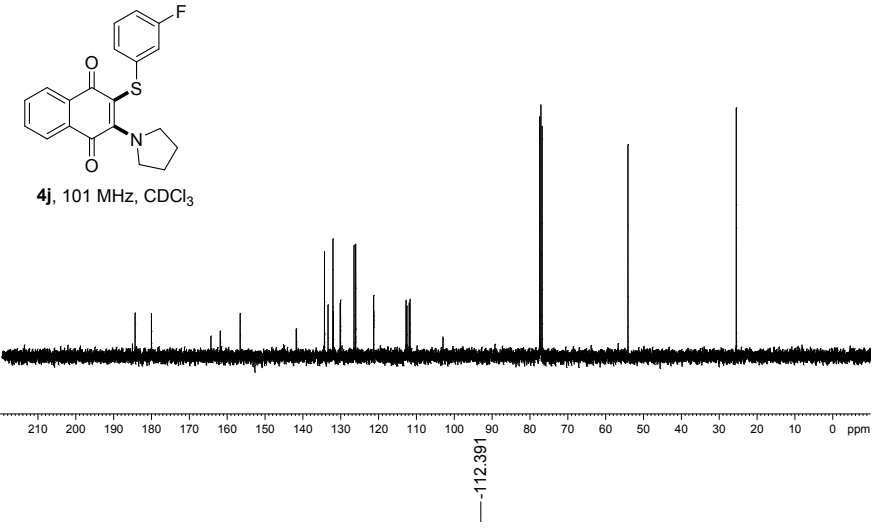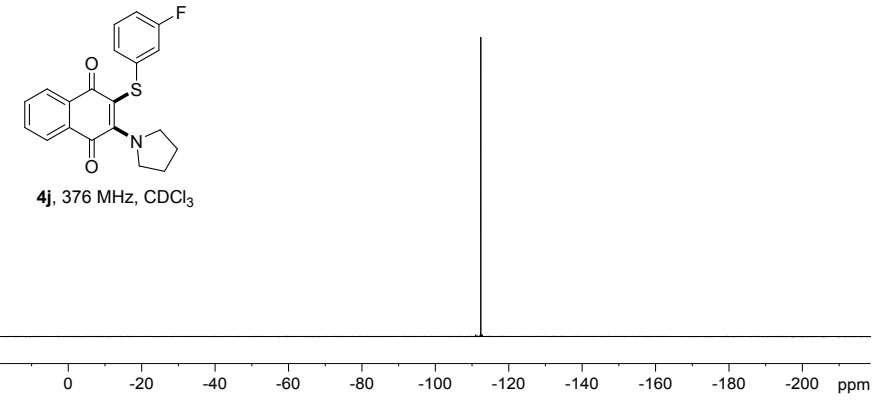

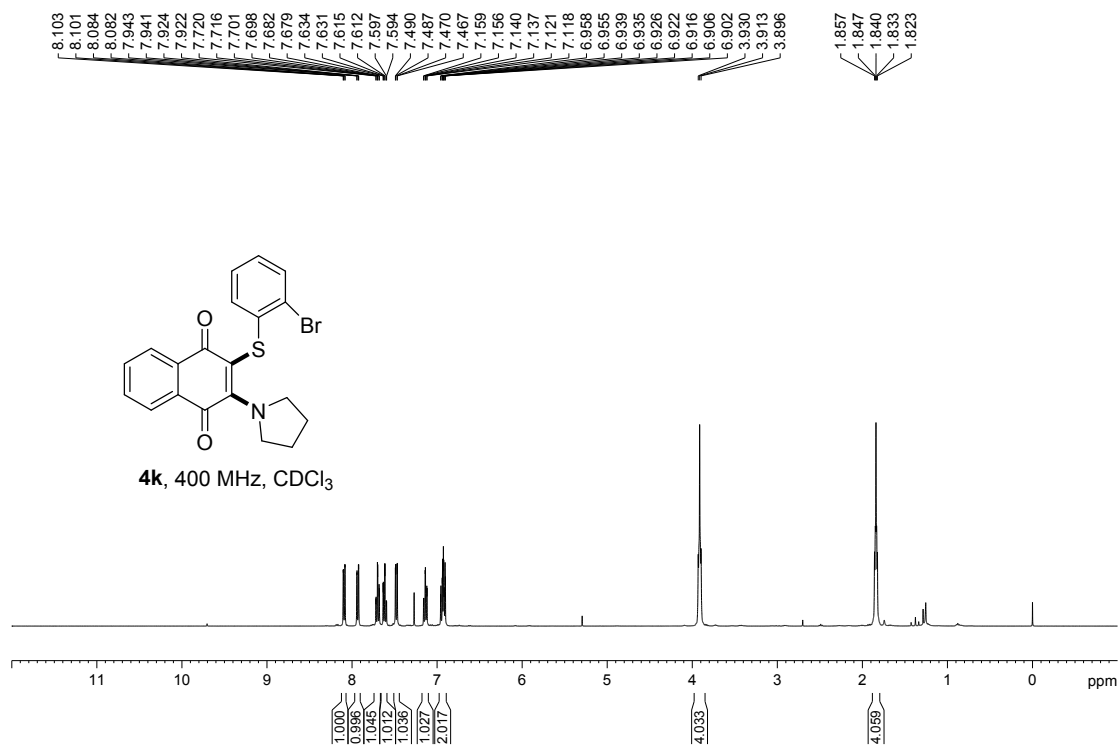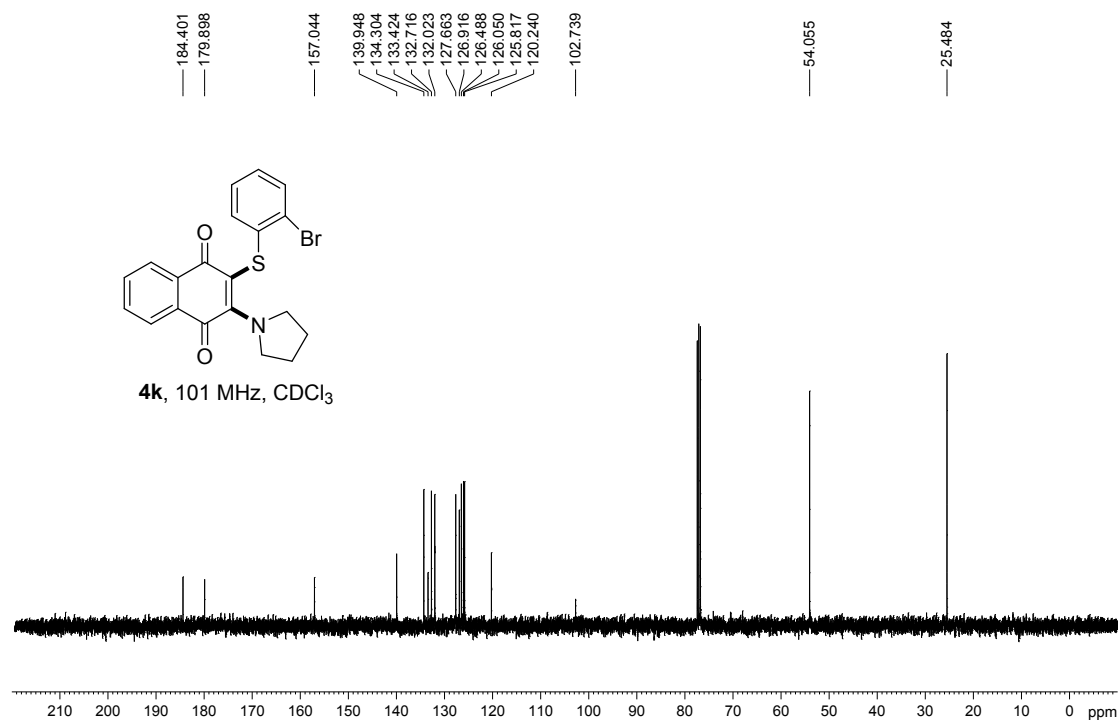

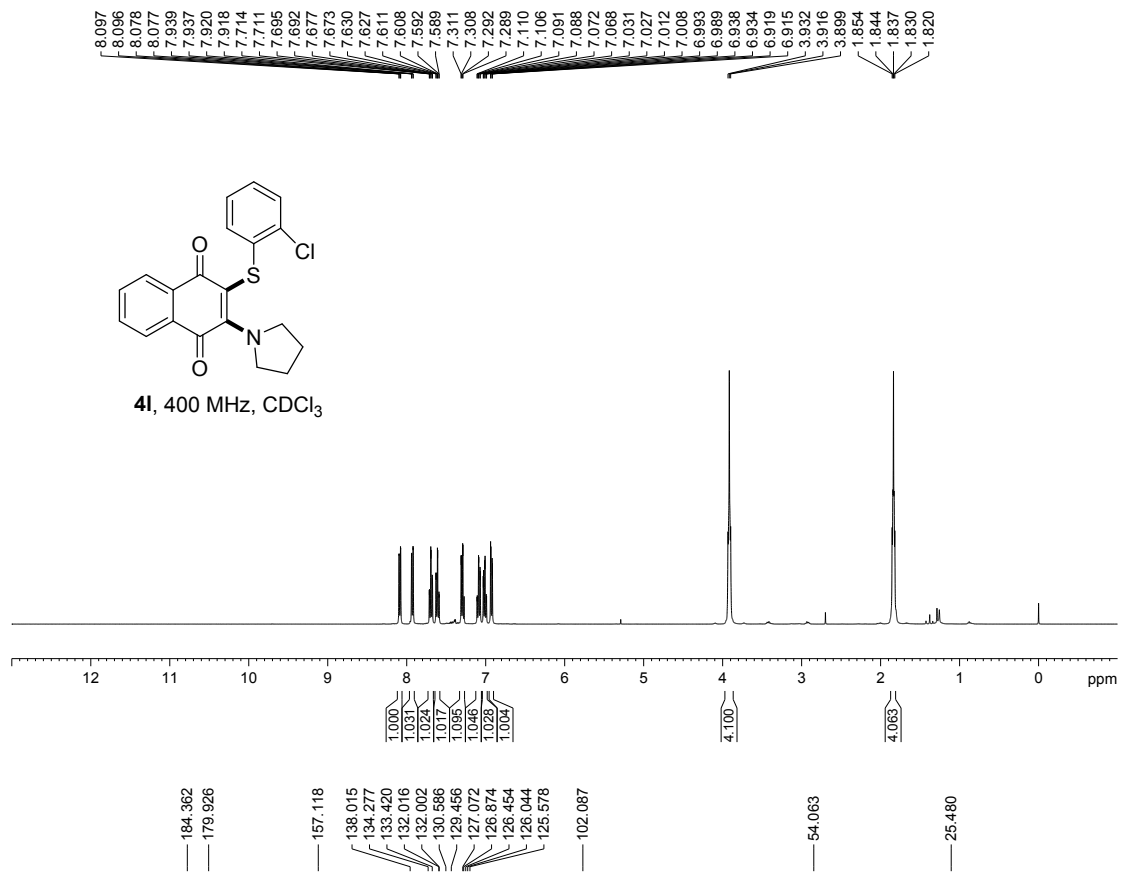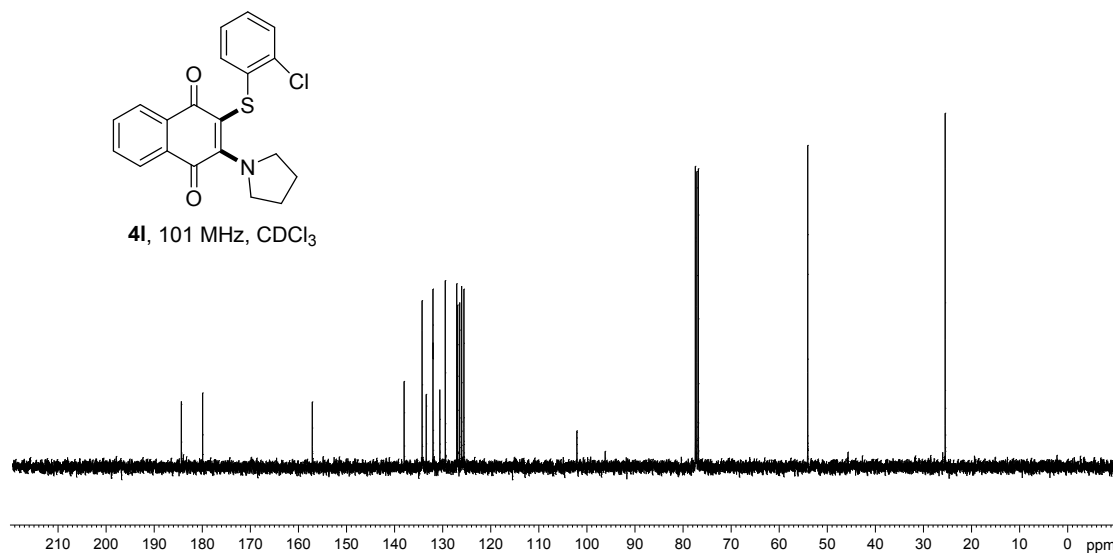

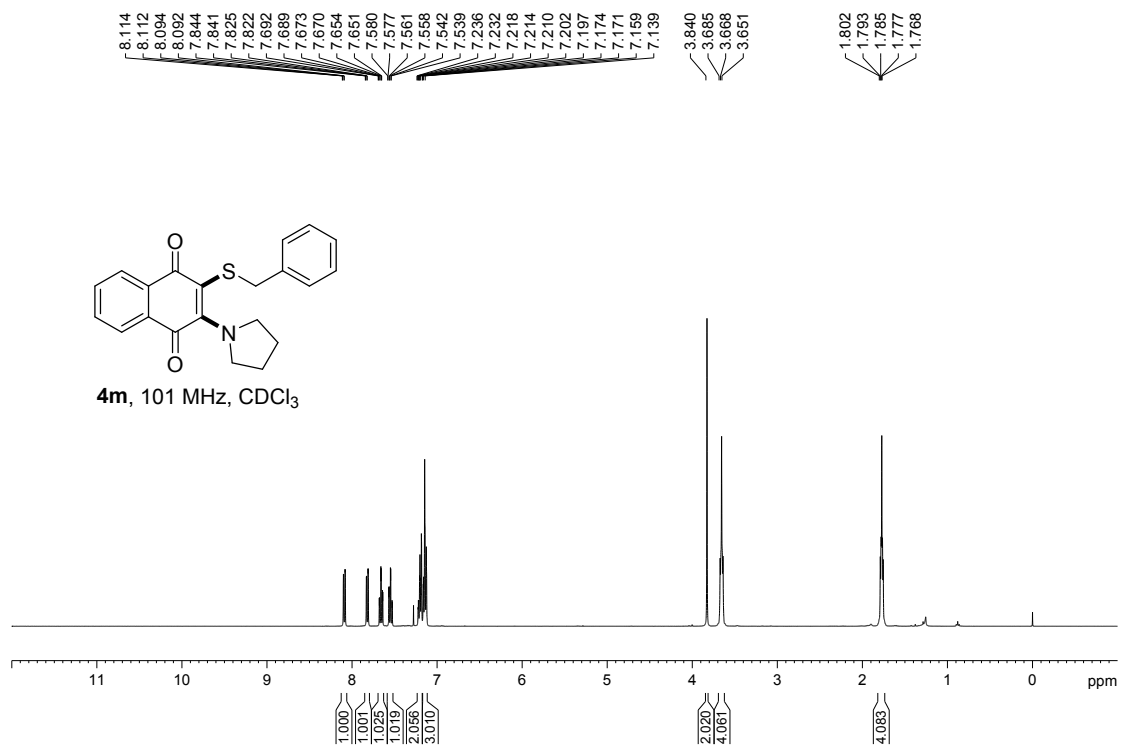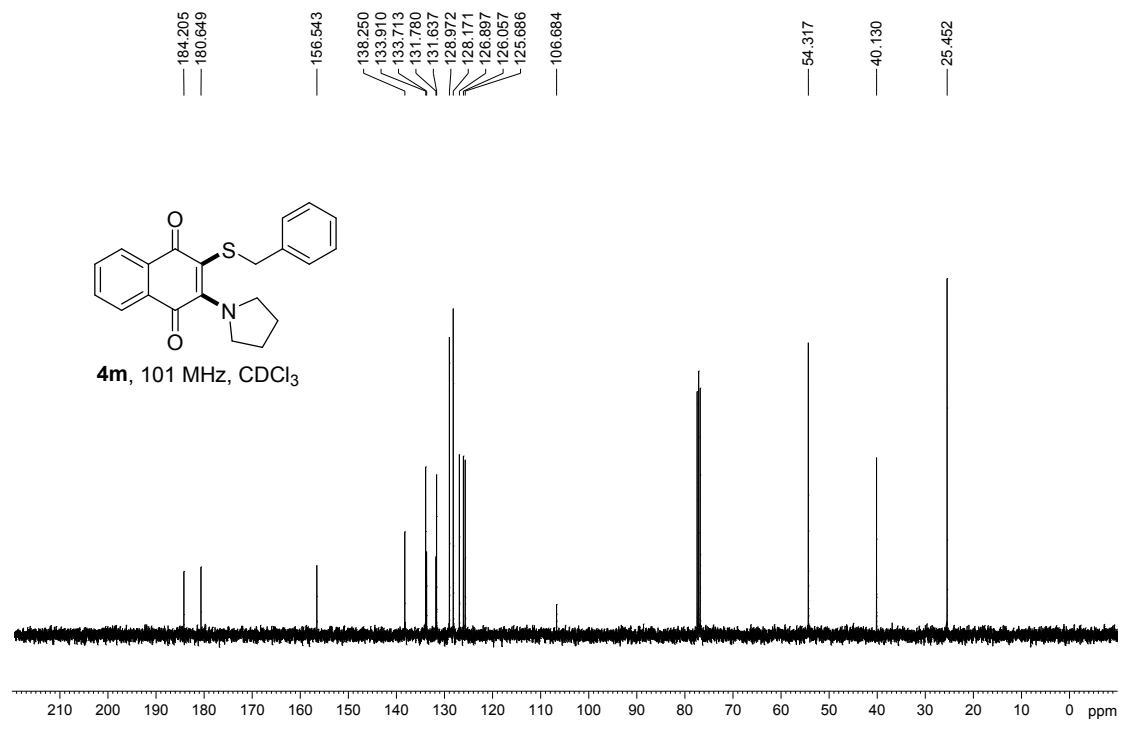

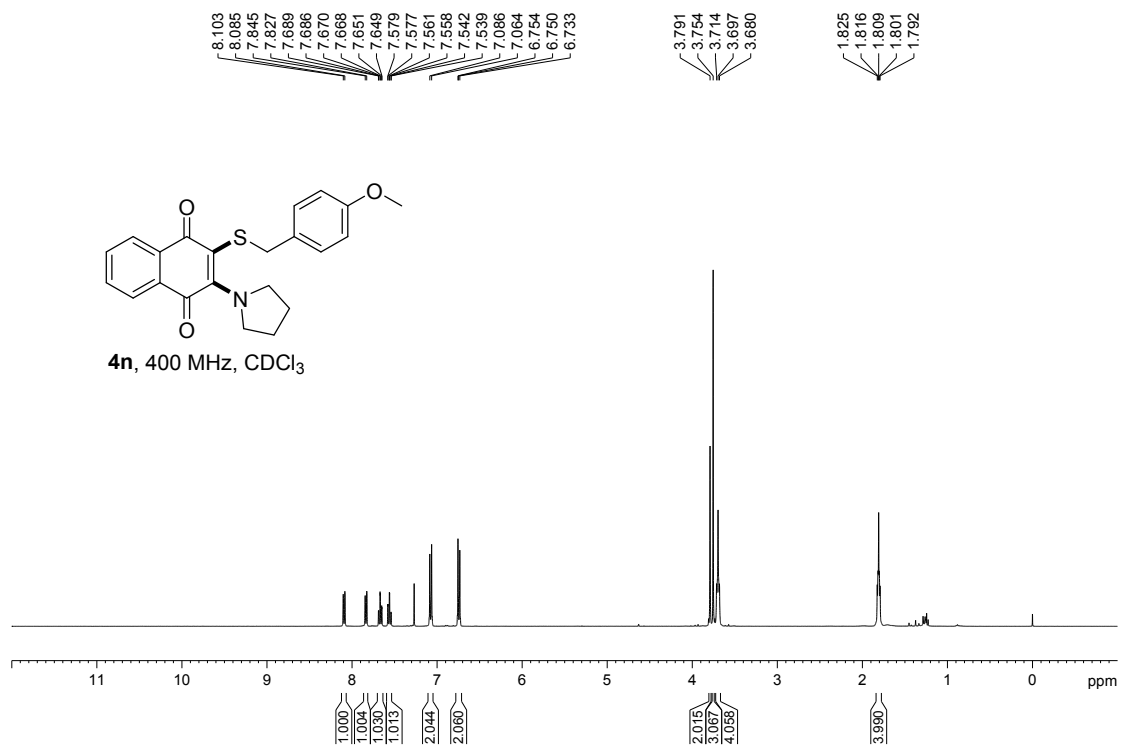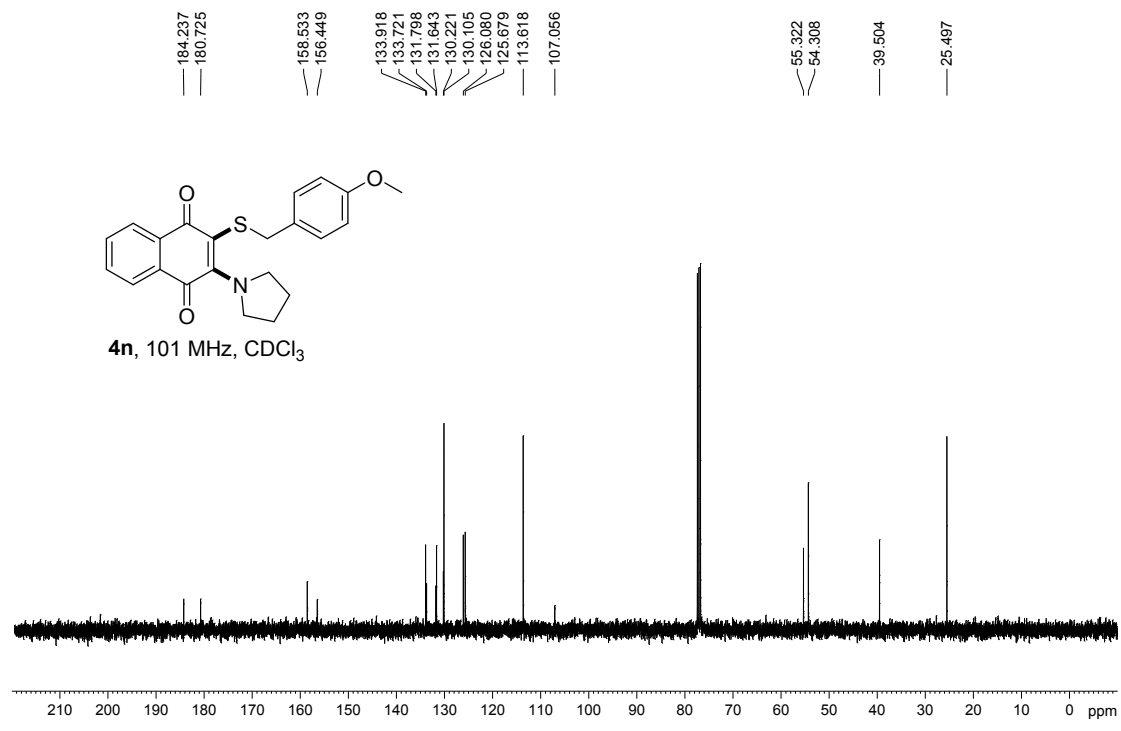

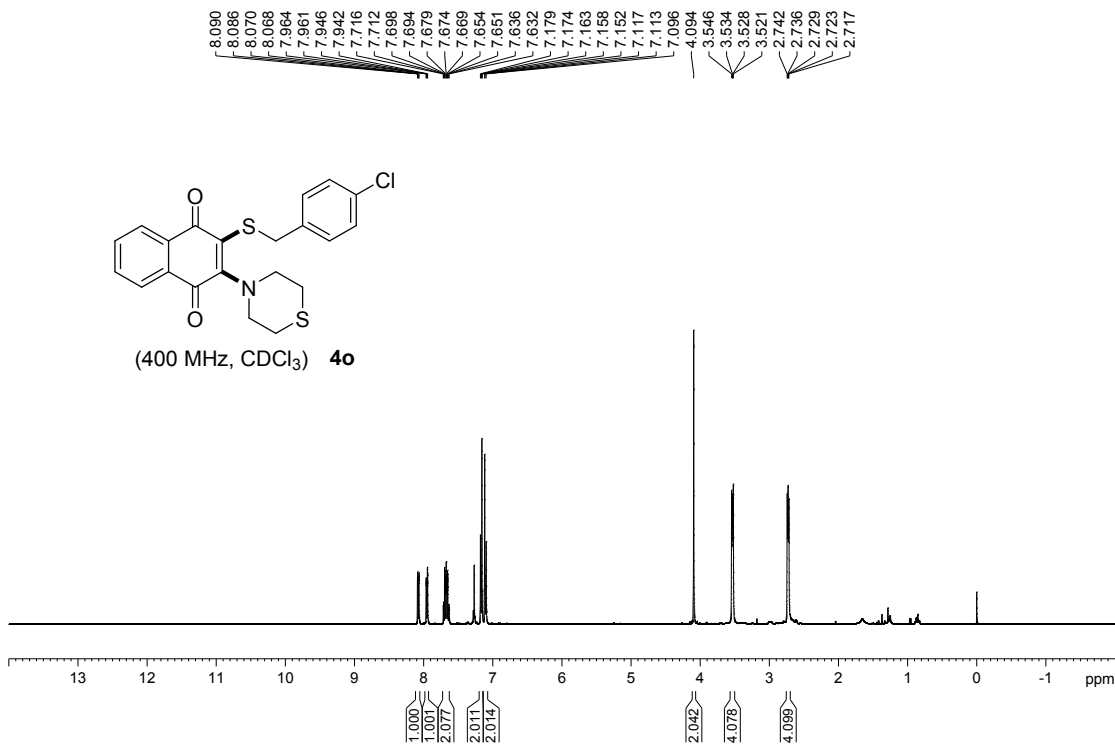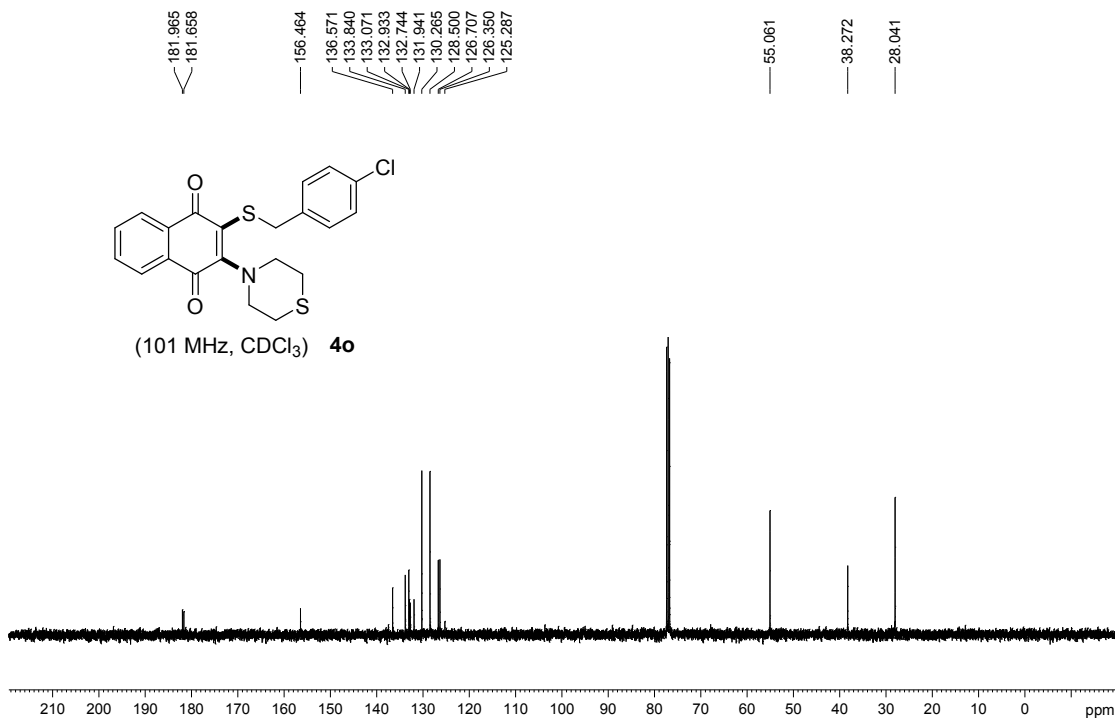

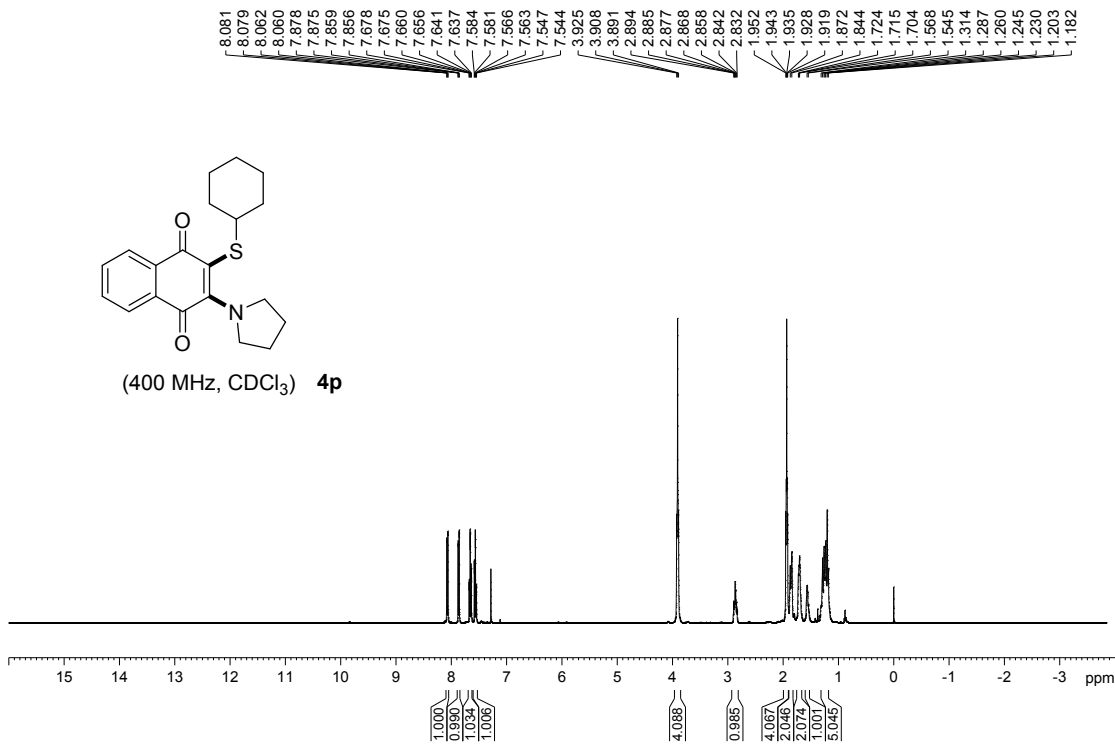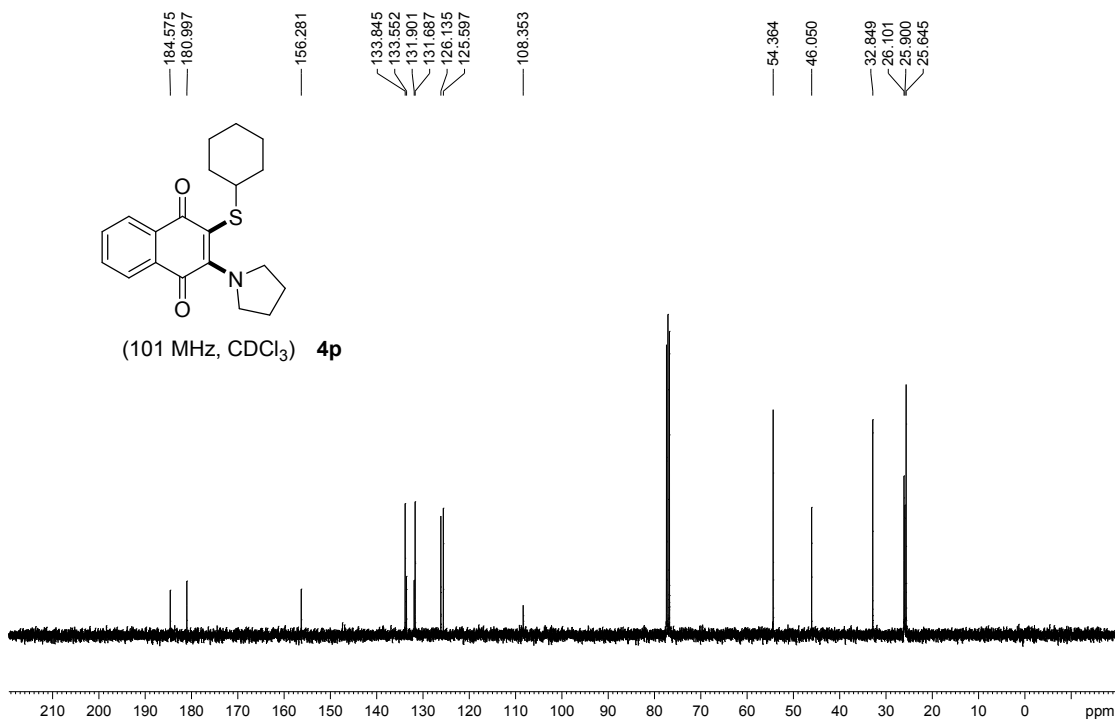

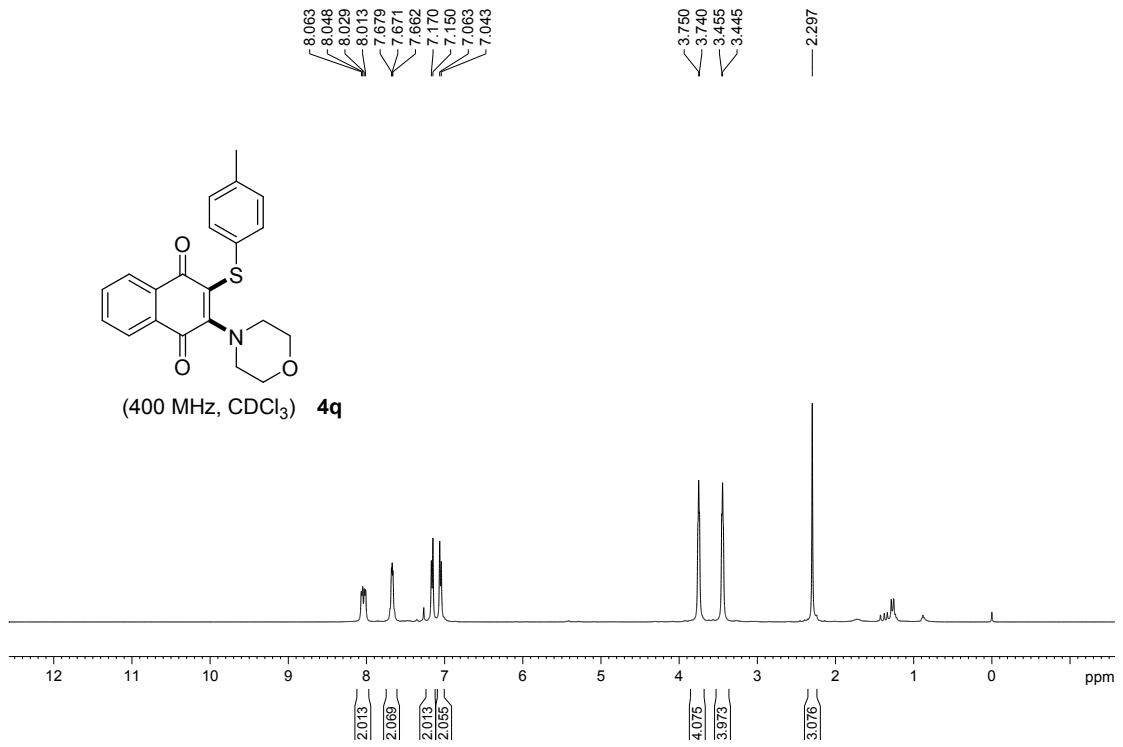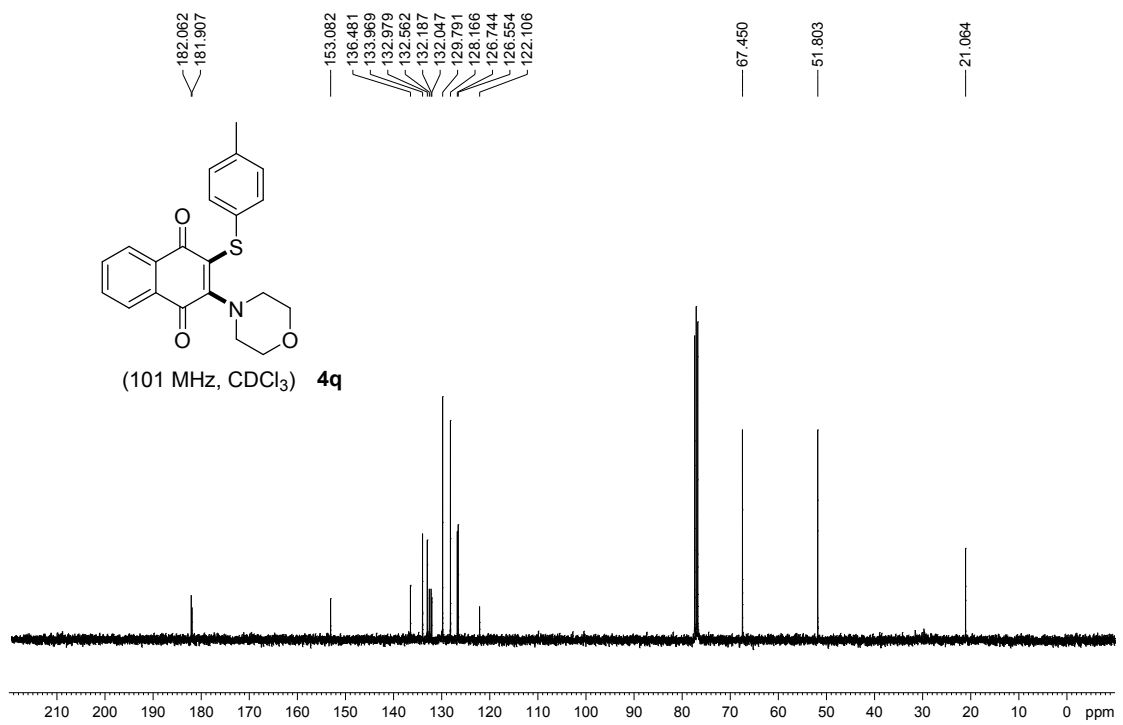



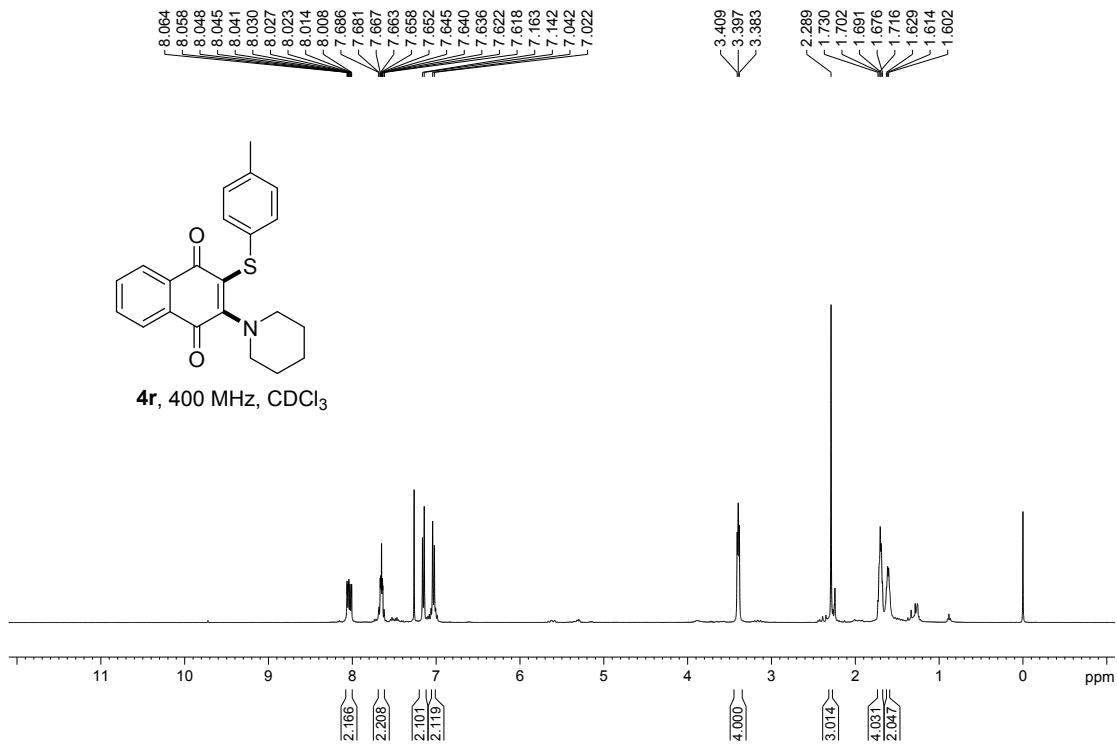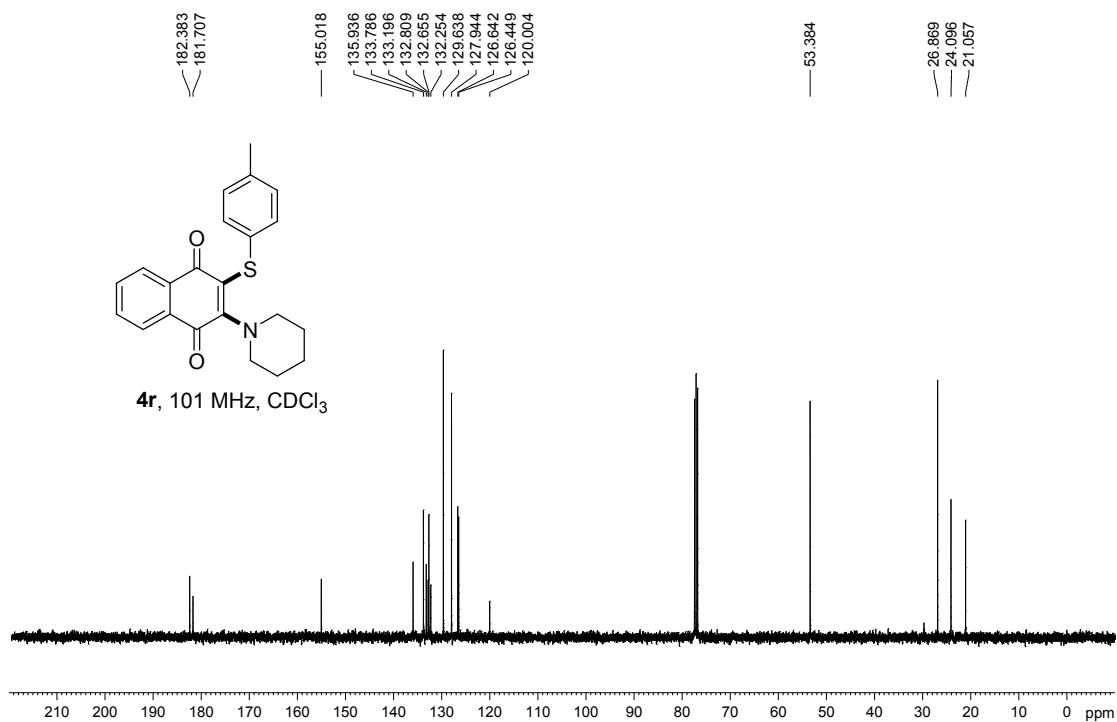

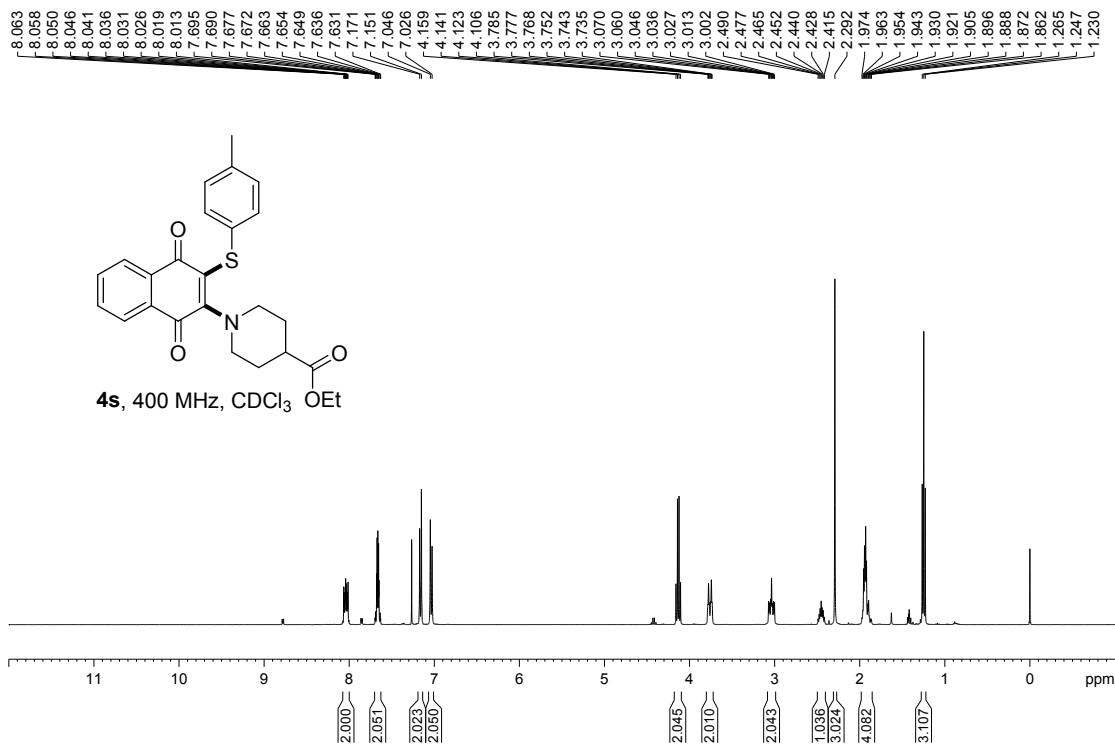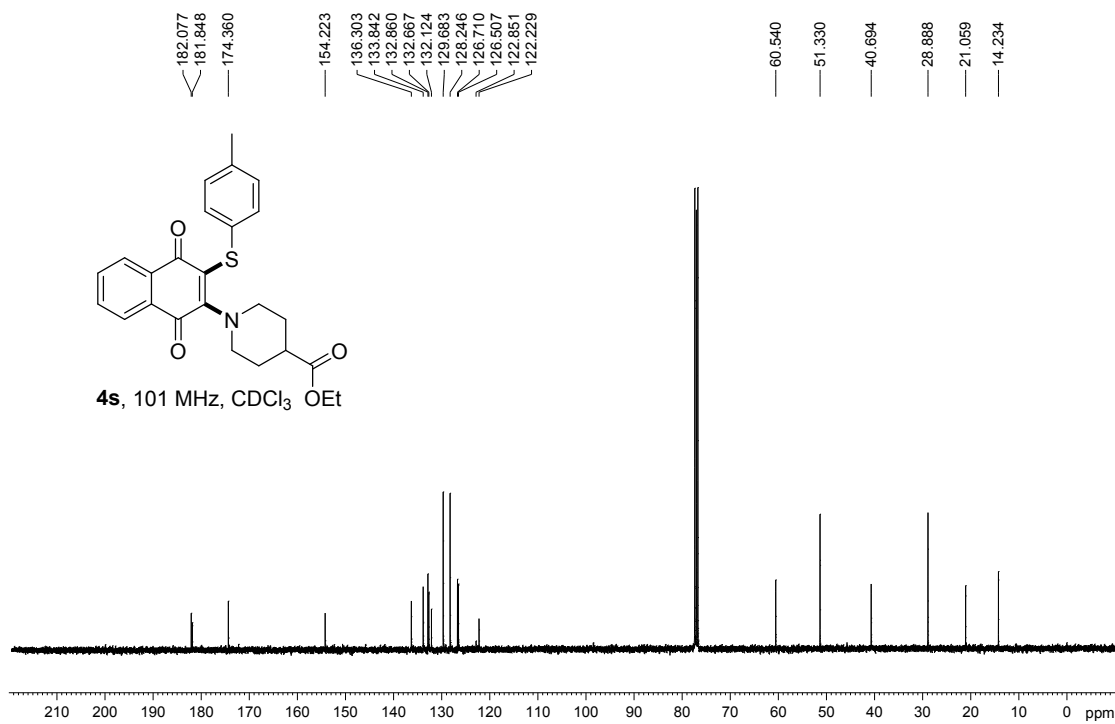

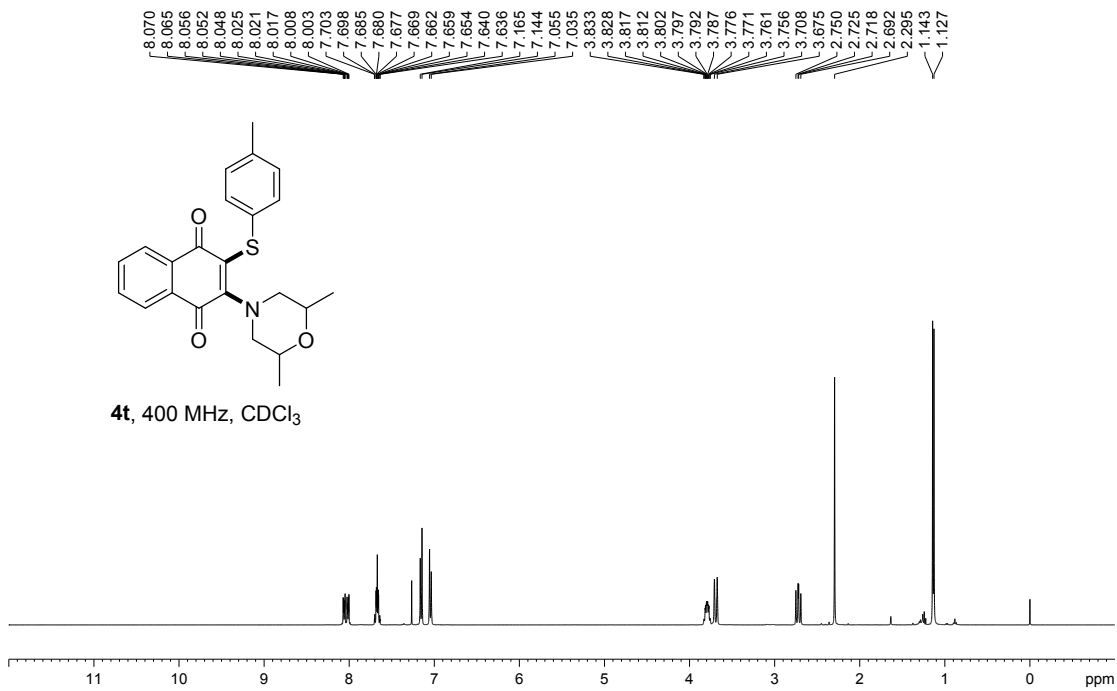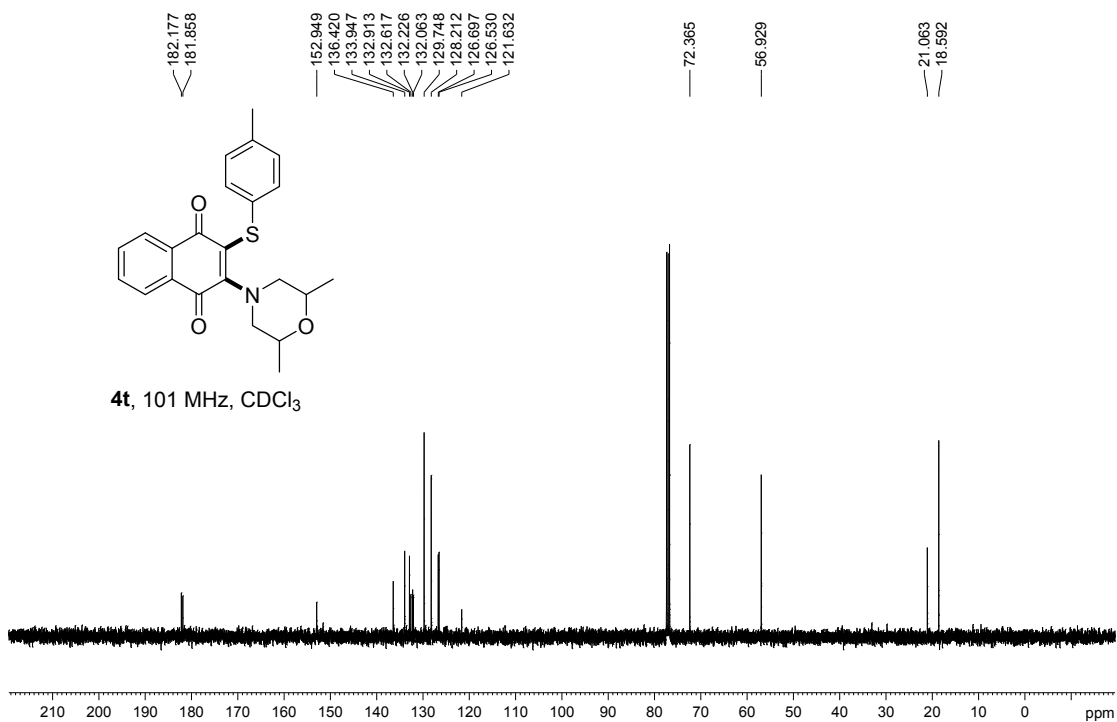

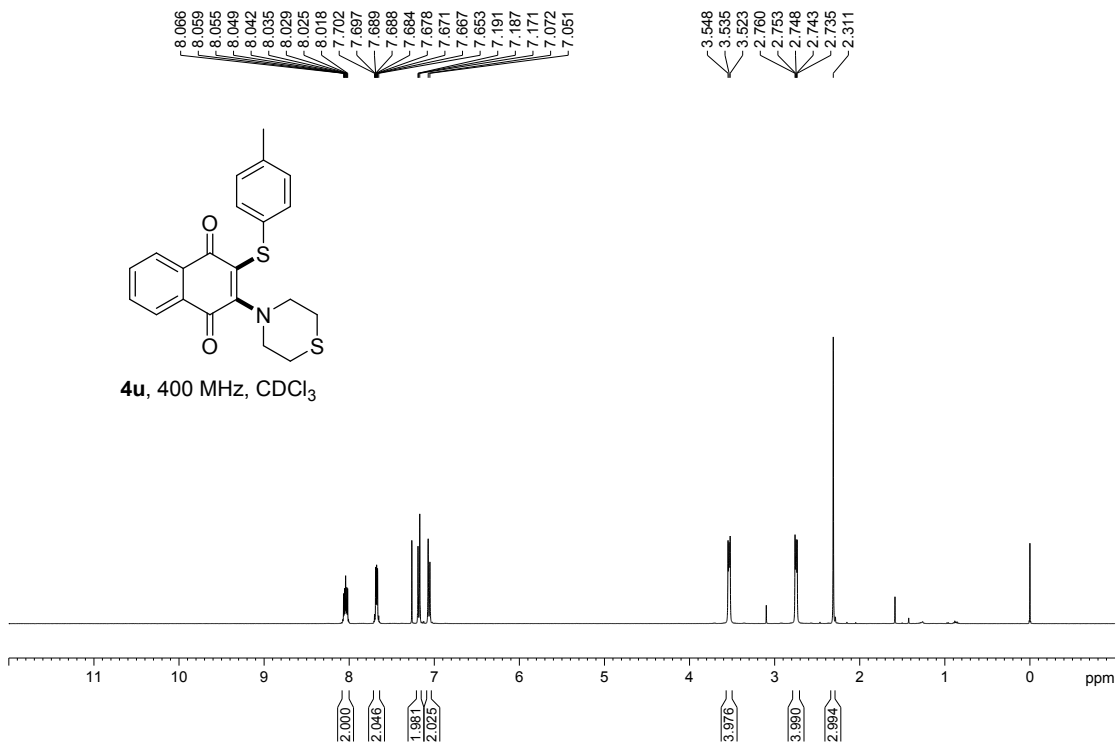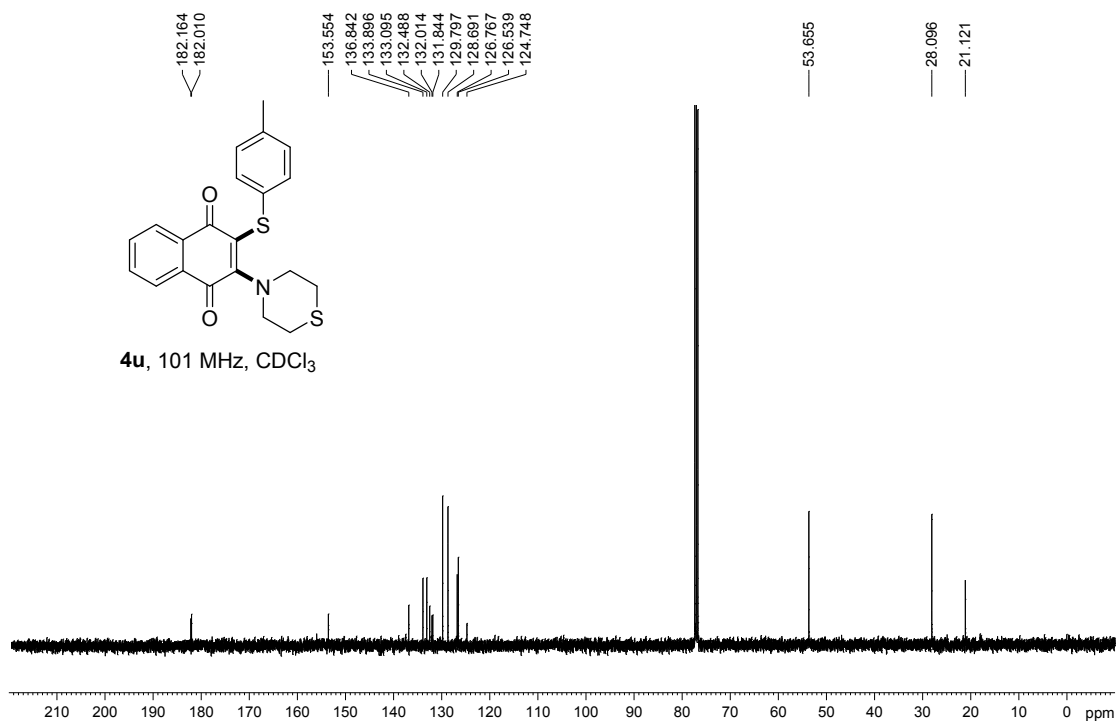

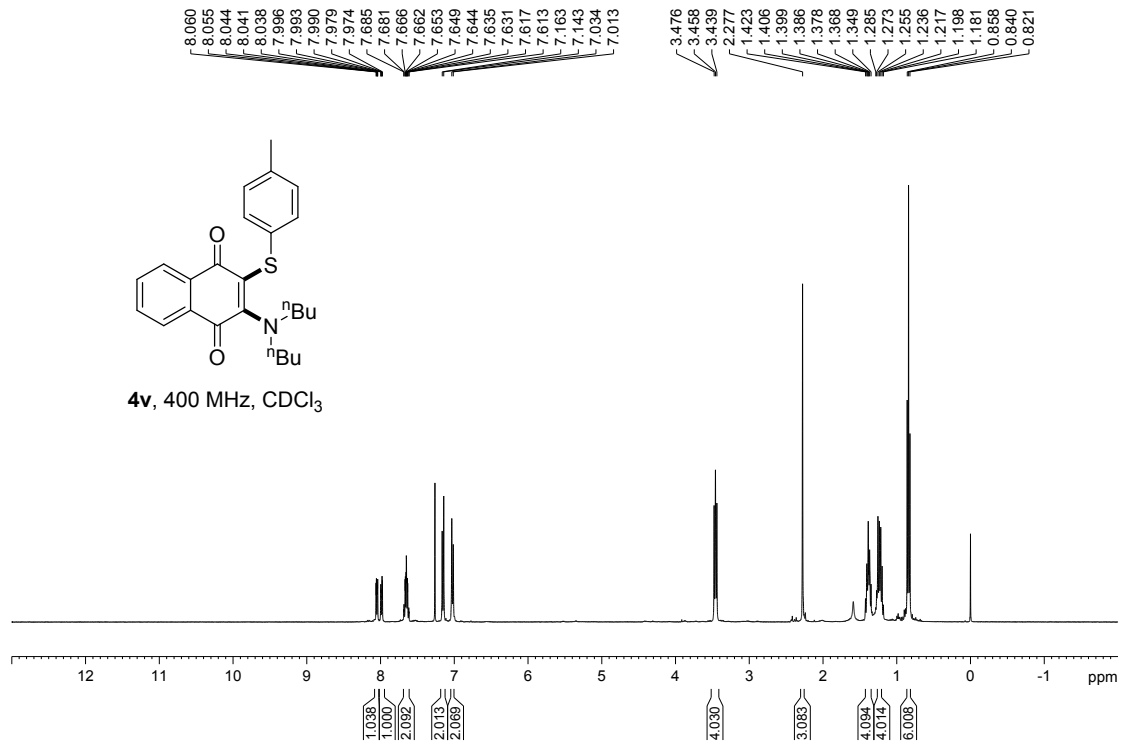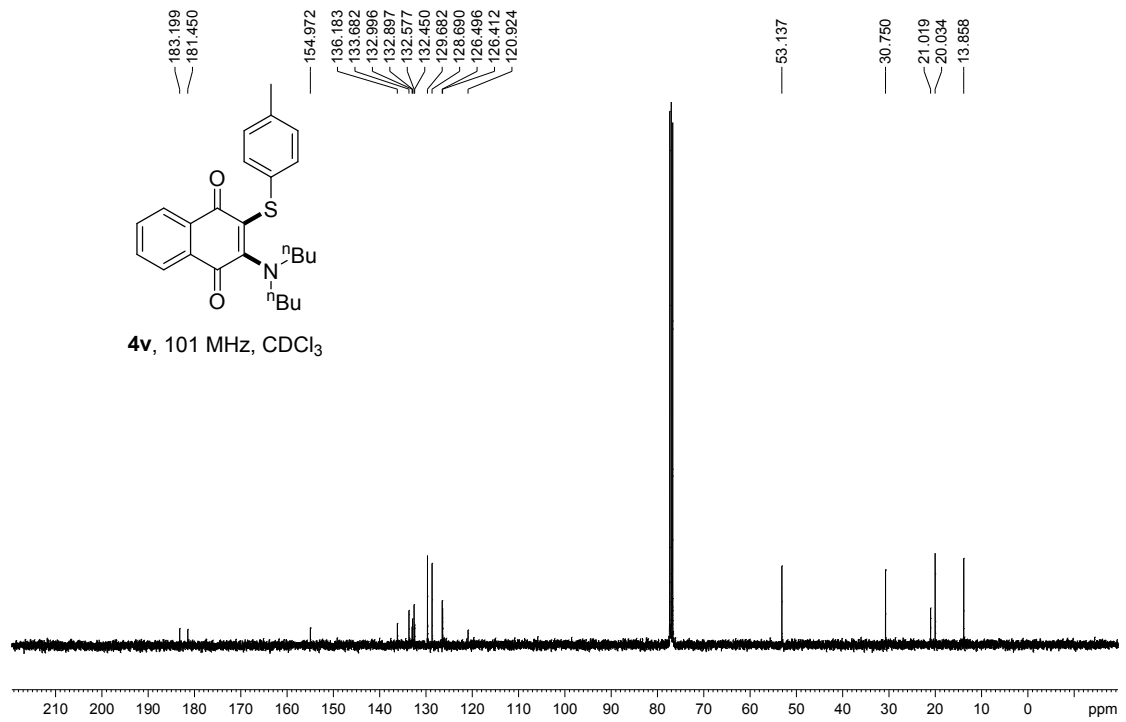

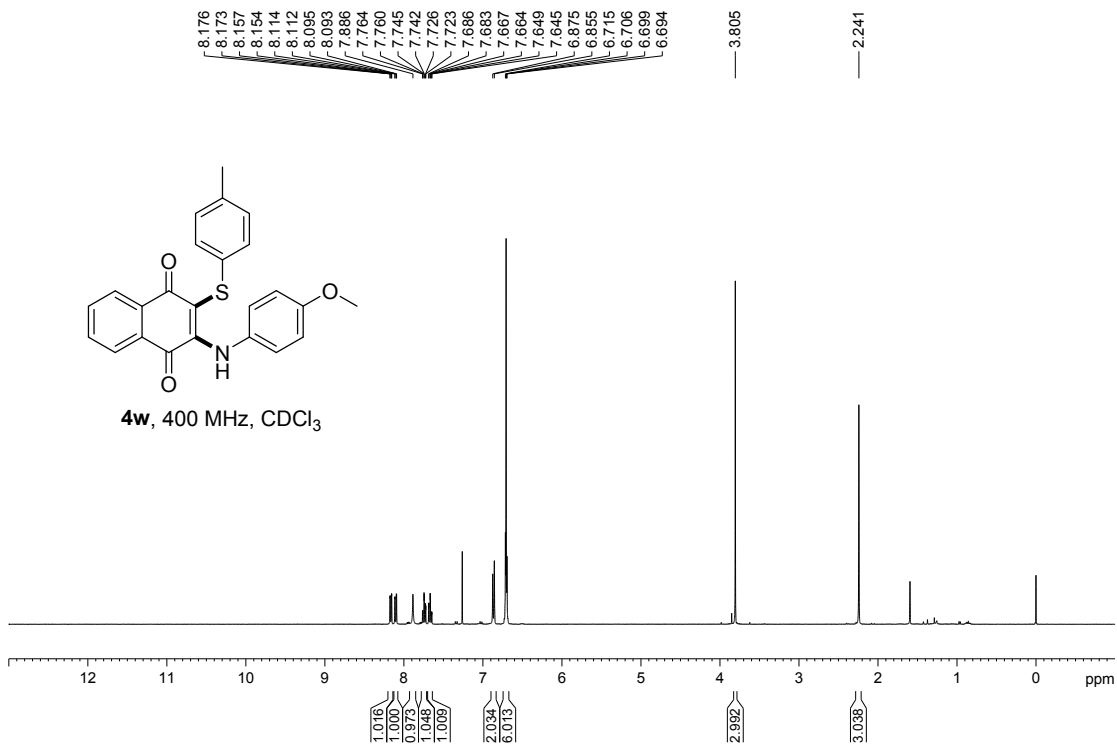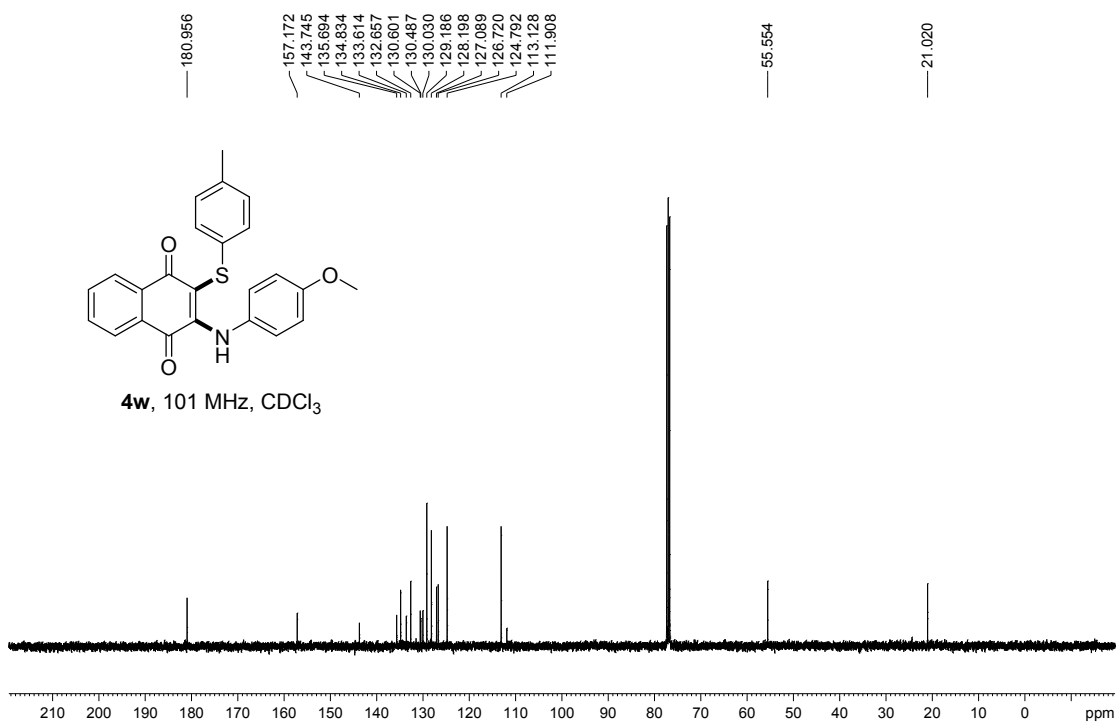

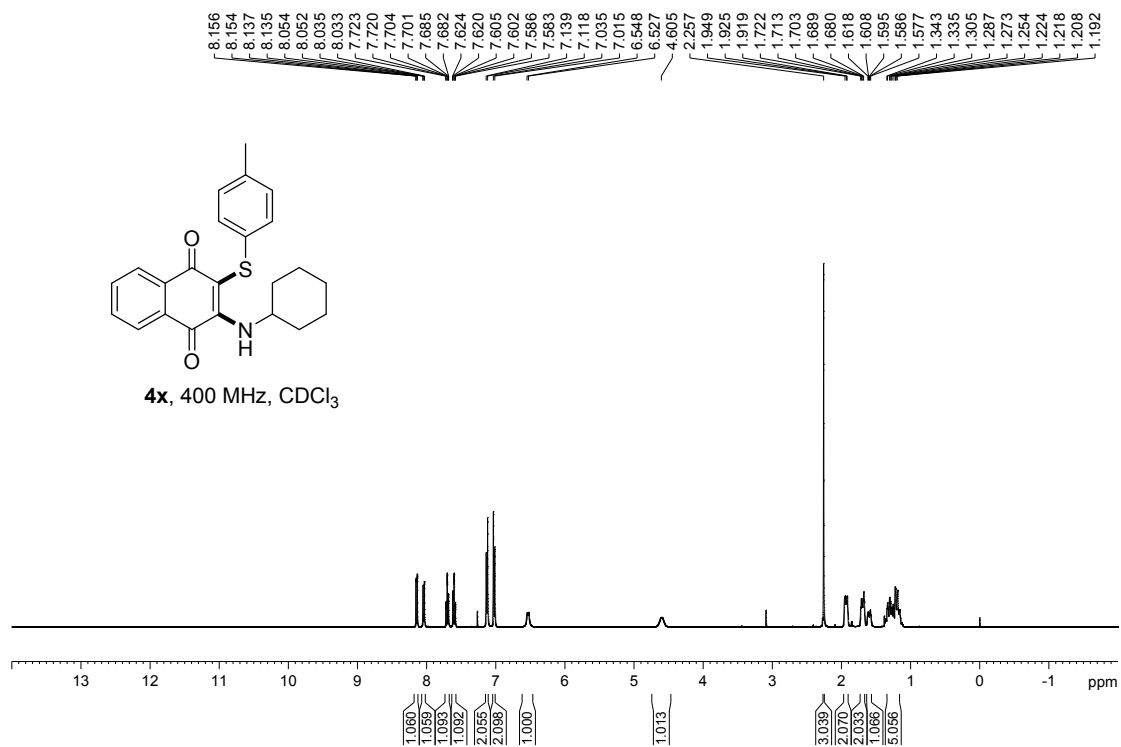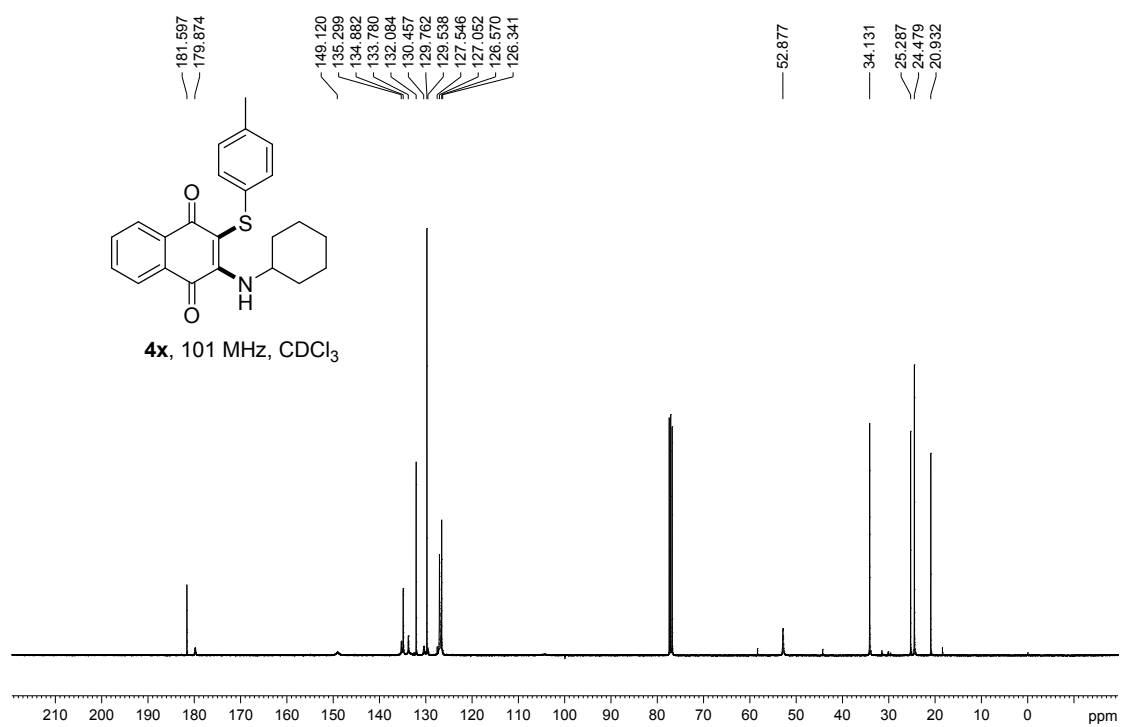

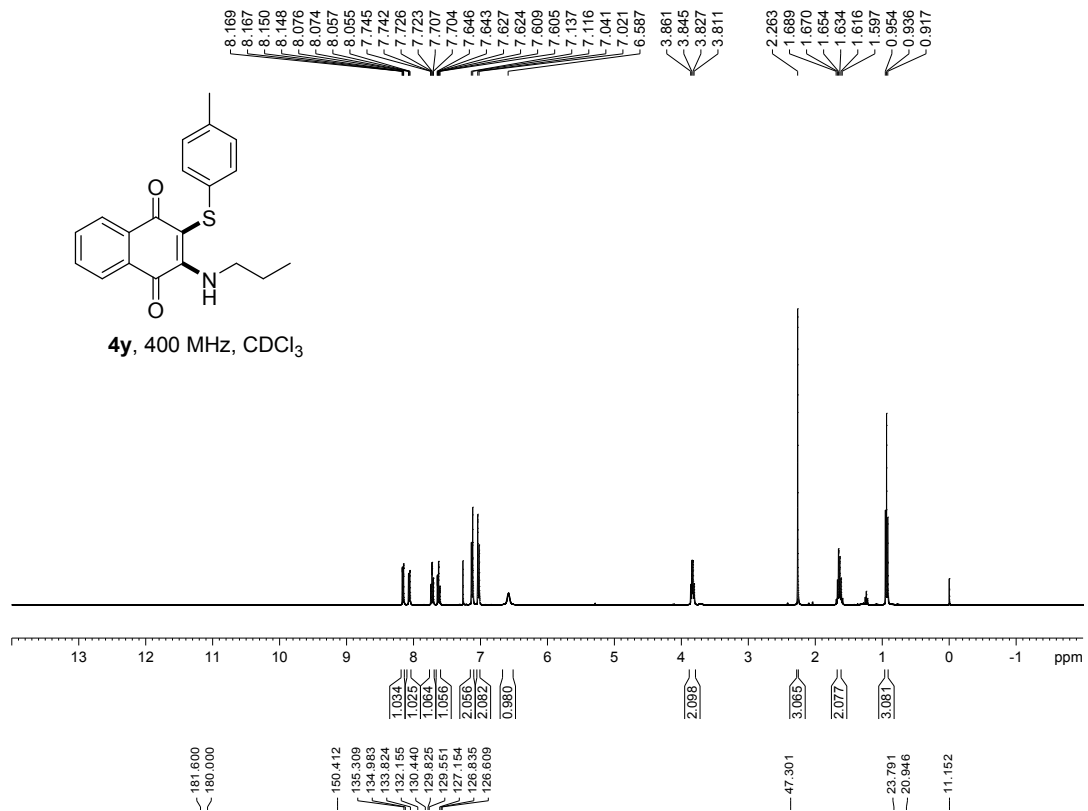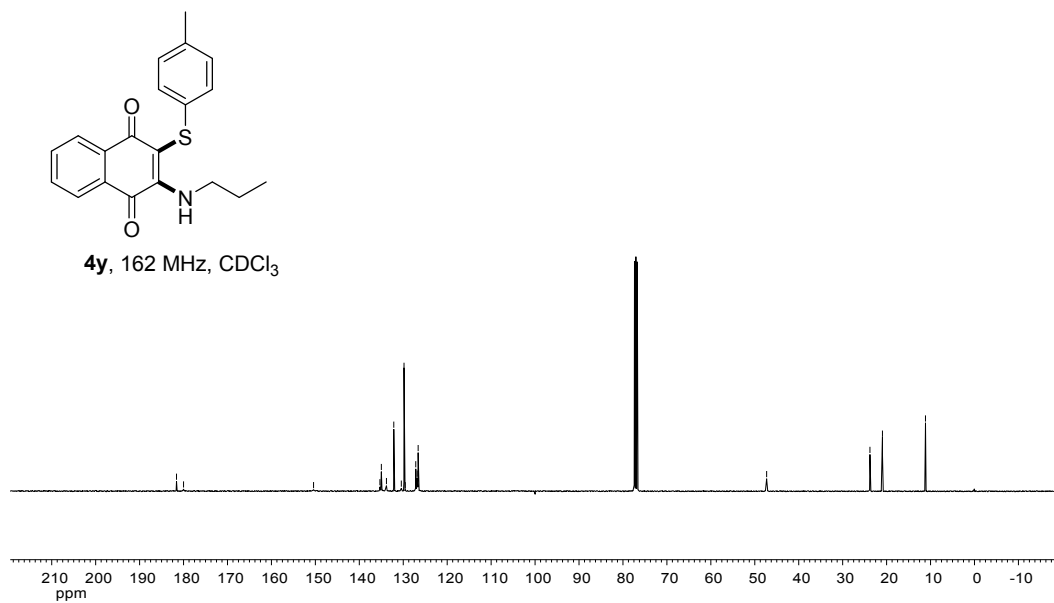



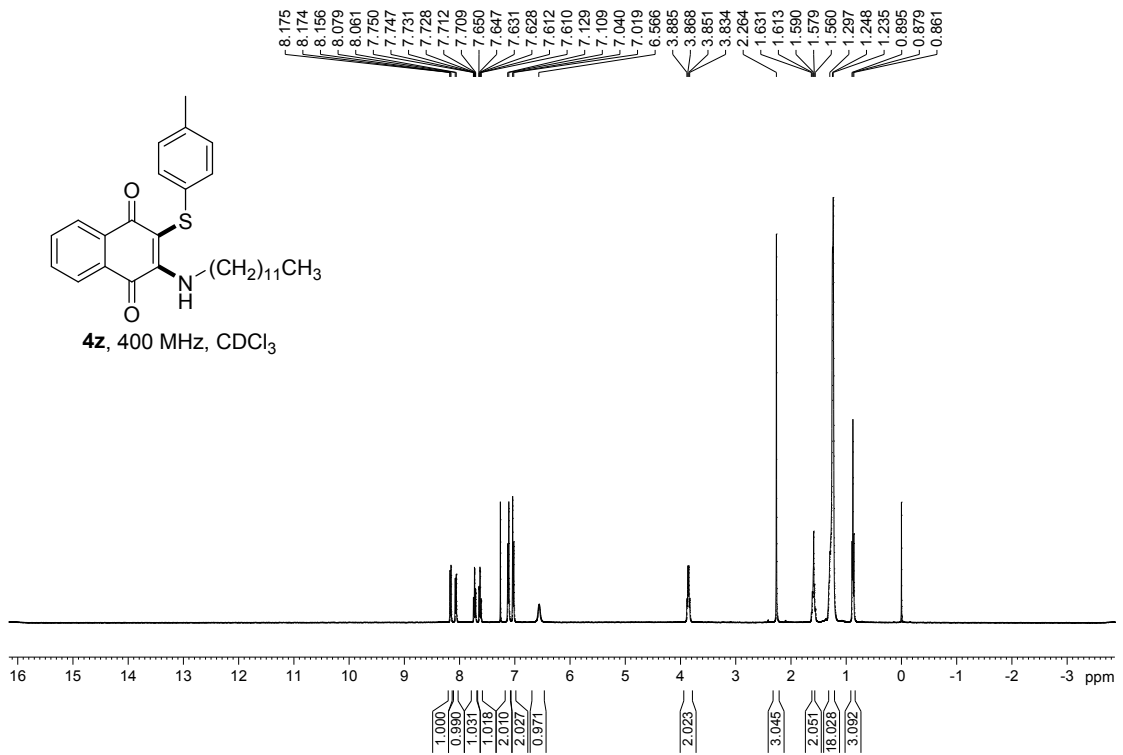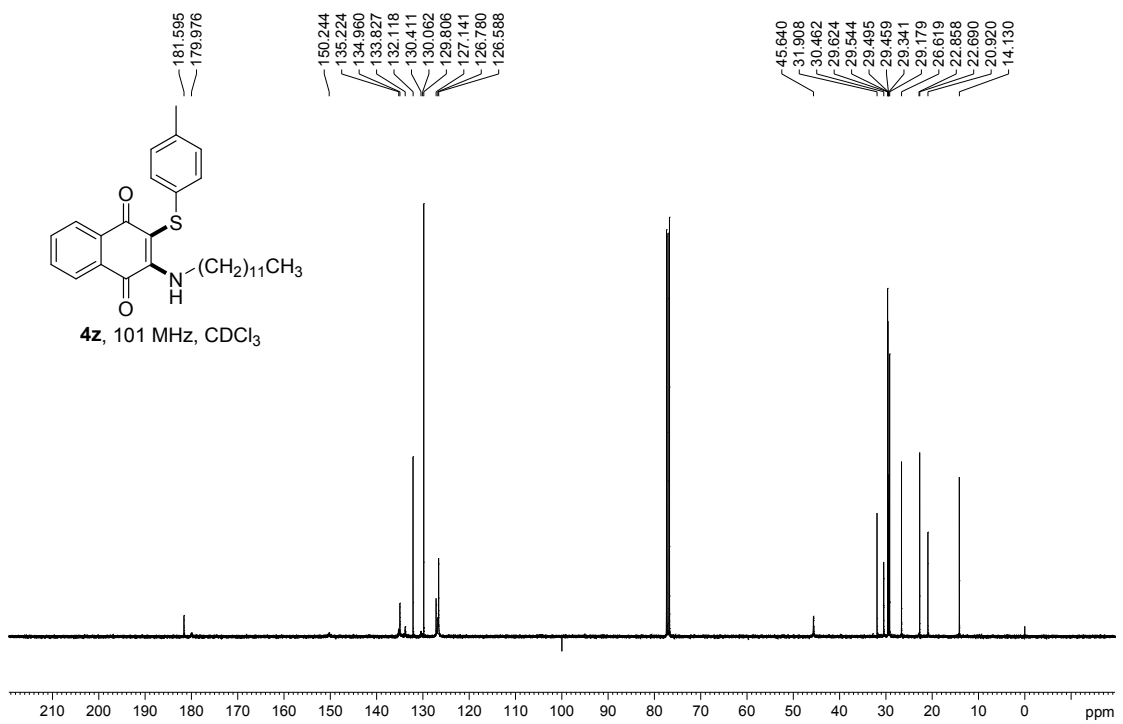

8.066  
8.064  
8.047  
8.045  
7.989  
7.986  
7.980  
7.977  
7.679  
7.676  
7.660  
7.657  
7.641  
7.638  
7.604  
7.601  
7.585  
7.582  
7.567  
7.563  
6.010

3.799  
3.790  
3.787  
3.783  
3.778  
3.775  
3.766  
3.030  
3.022  
3.018  
3.015  
3.006

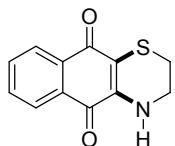

**6a**, 400 MHz, CDCl<sub>3</sub>

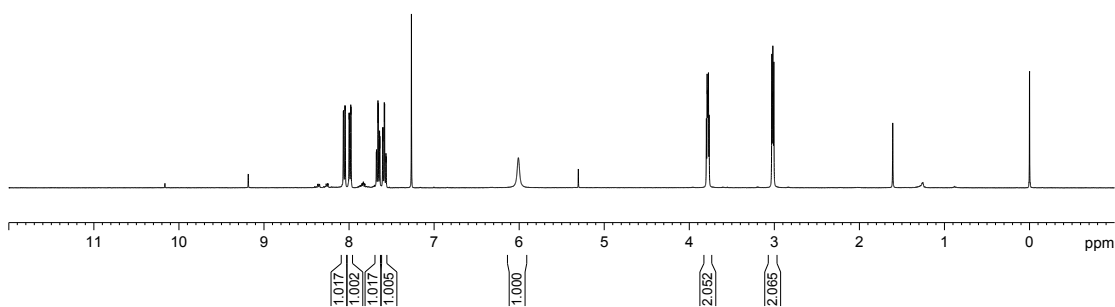

179.314  
177.931

140.925  
134.248  
133.132  
132.327  
130.300  
126.320  
126.195

111.394

41.714

23.921

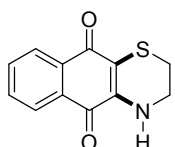

**6a**, 101 MHz, CDCl<sub>3</sub>

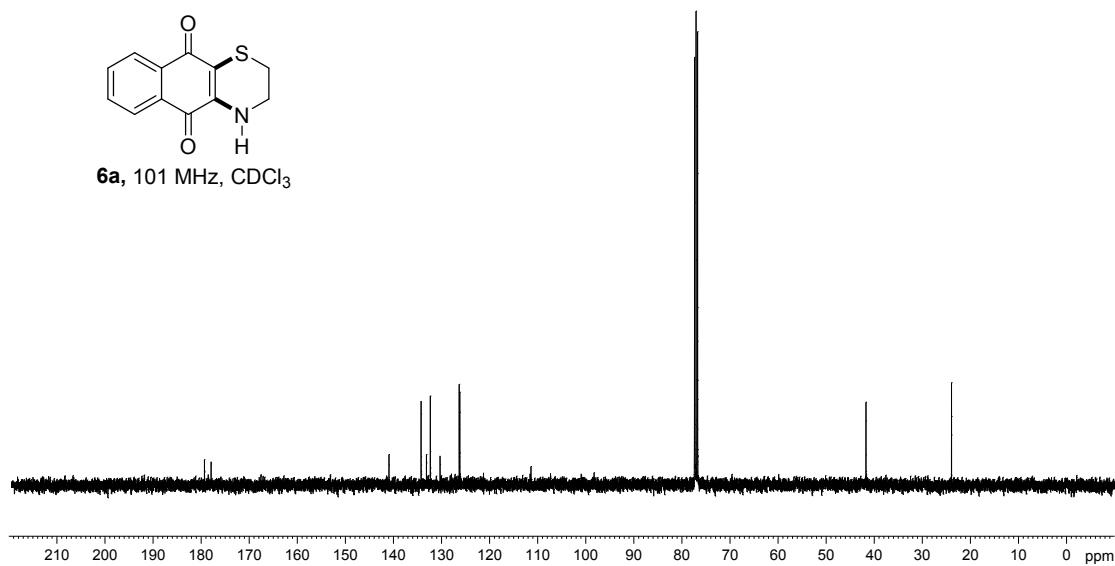

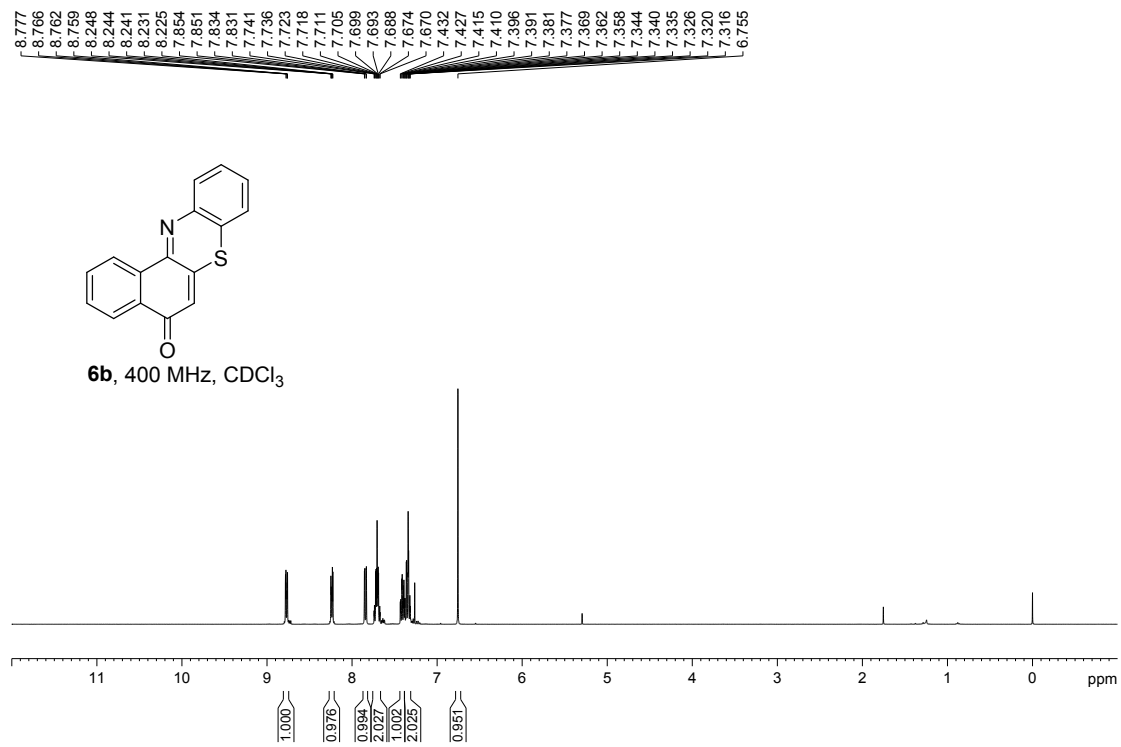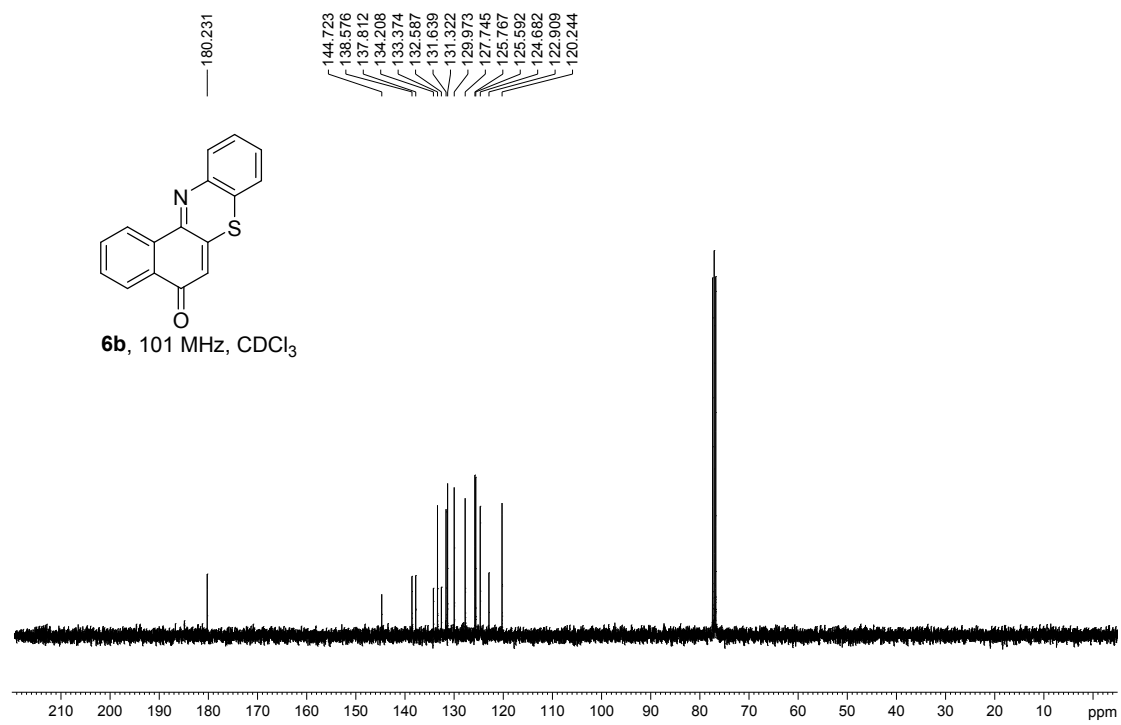

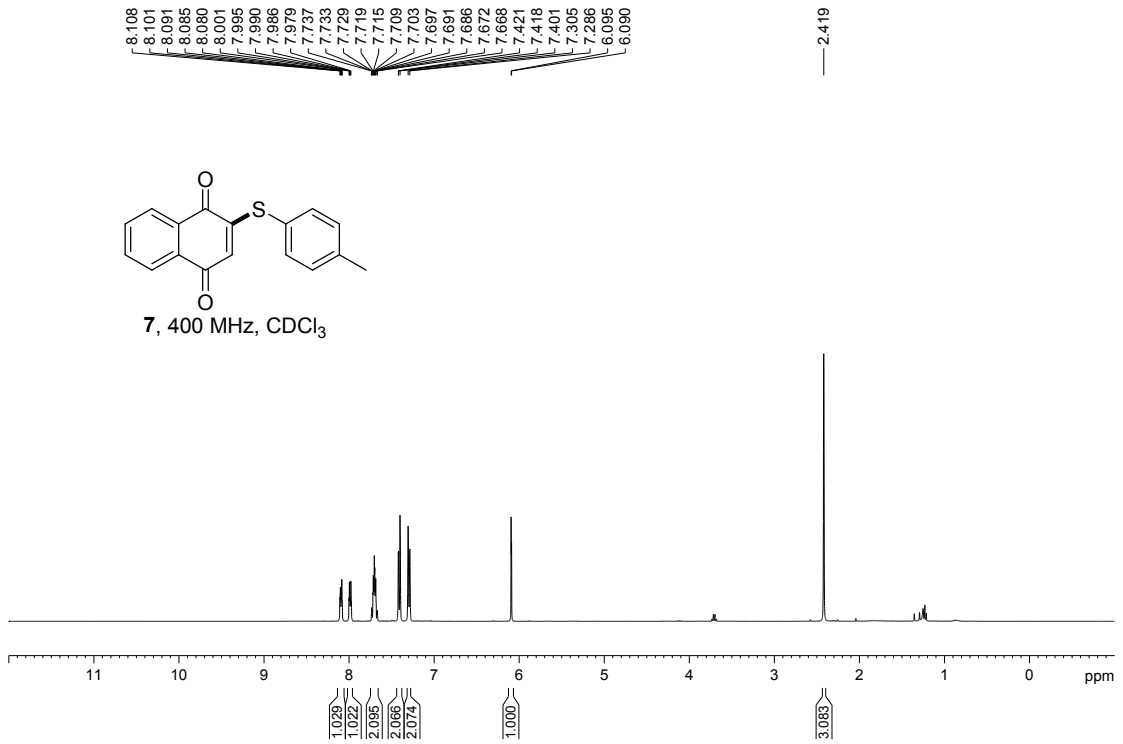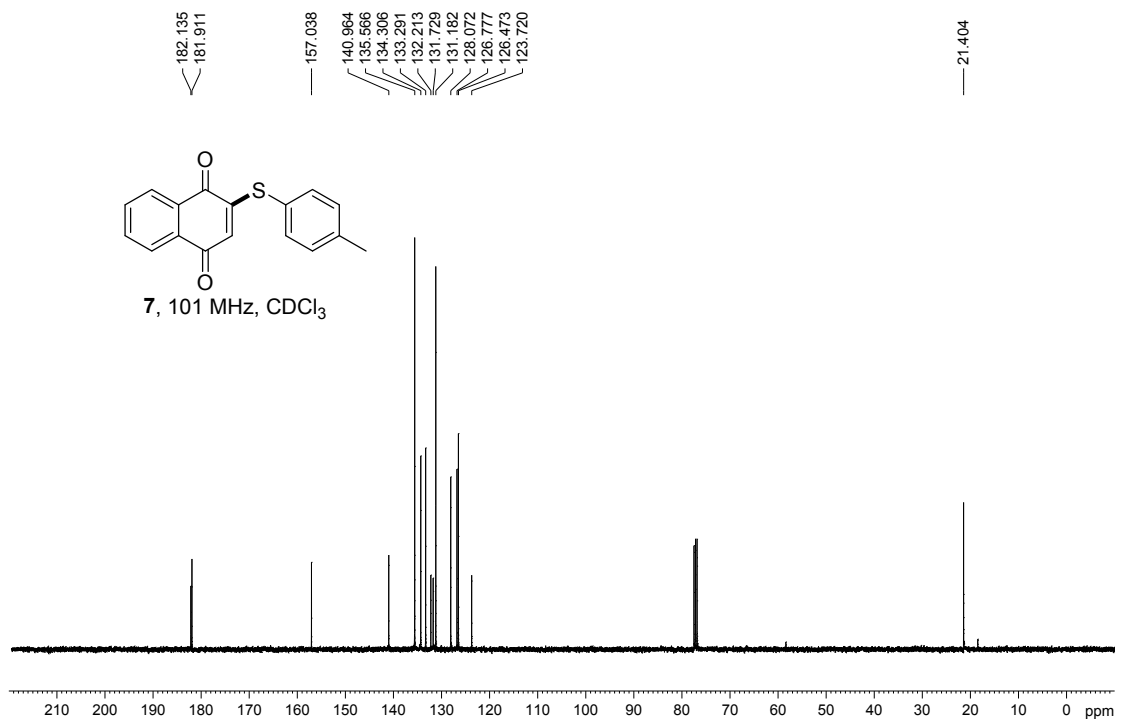

Supplement: c9qo00091g1.pdf [file c9qo00091g1.pdf]
